# Supplementary material
Source: publisher site journal article supplement (https://www.dovepress.com/article/573697)
Supplement: Supplementary file 1 [file 573697%20Revised%20Supplementary%20Materials.doc]

**Supplementary File 1.** Examples of leadership tools used in training with detail

| 5. DESC Method | Objective: To formulate constructive criticism, persuasive arguments and conflict resolution using the DESC method.  - **D**escribe the facts and their consequences  - **E**xpress my emotions and my responsibility using "I"  - **S**pecify solutions, involving the other person  - Positive **C**onsequences of change |
| --- | --- |
| 8. Board with sections | Purpose: Useful tool for starting the continuous quality improvement process  - Allows you to practice Stand Up Meeting  - A key element of visual management, it helps to structure the information to be communicated and to monitor the progress of projects.  - Do not monitor actions individually, but involve the group  1- Order the necessary equipment  Magnetic whiteboard, Black sticky tape to mark off boxes, Magnets  Sticky notes and erasable pens  2- Define what you want to appear  Brain storming  Keep ONLY what is useful as visual information  Allows you to track the progress of your projects and quickly read the monitoring indicators.  3- Think about the organisation on the board  Organise, place  4- Standardise  To enable staff mobility  Define the rules to ensure that the tool is efficient and useful to everyone  5- Update  As often as necessary  As soon as new information needs to be communicated  As soon as a project has been completed  As soon as a solution has been found  As soon as a new problem arises  Monitor the application of standards  Valuing the results achieved, thanking for the results achieved  Encourage involvement  Examples: indicators (to be defined according to the sector), problem identification (assessment, repercussions, prioritisation, solutions), projects (PDCA), information, etc. |
| 9. Stand Up Meeting | Purpose: to pass on information and have short, effective discussions on current projects.  Principle: The manager is in charge of the session, with participants standing in a circle to ensure effective discussion. The manager controls the time and ensures that everyone who wishes to can express themselves. The meeting takes place in front of a board on which notes can be placed and/or moved according to priorities.  Duration: 5 to 15 minutes maximum  Objectives: to pass on information and provide a rapid update on current issues in an efficient manner.  - General review of what has been done and what needs to be done  - Reflection on a shared problem, the aim being to find a team solution  - Exchange of information  - Group dynamics by injecting dynamism  - Overall vision of the work/project, with an objective to be achieved  Advantages :  - Limited time for discussion  - Freer and more natural exchanges  - Increased attention from participants, as being static is painful  - Development of collective exchanges to encourage collaboration  - Identification of areas to be developed or abandoned |
| 15. FORDEC | Purpose: FORDEC is the acronym for the method of optimising a decision to resolve a complex situation.  **F** = Facts Collection of objective, factual and decisive information about the situation.  **O** = Options Synthesis of the different courses of action by listing the possible options: Feasible, Reasonable, Regulatory, Profitable.  **R** = Risks and benefits Analysis of the advantages and disadvantages of each option. Seek external advice if necessary (colleague, team, superiors, etc.)  **D** = Decision: In most cases, if the assessments have been accurate and complete, if the options have been challenged methodically and interactively through discussion, the proposed solution should meet with consensus. As a last resort, the person in charge decides.  **E** = Execution: Tasks are allocated by the decision-maker. Useful information is passed on to the players involved.  **C** = Control: Each time there is a change, we check that the chosen solution remains valid, and we consider whether it is necessary to carry out a new FORDEC if necessary. A plan B is drawn up if necessary, depending on the context.  Best practice: Let the least experienced employee speak first. |

**Supplementary File 2.** Complete list of leadership tools used in training

| 1. Congratulate in 60 seconds |
| --- |
| 1. SMART Objectives |
| 1. Declare objectives in 60 seconds |
| 1. Rectify in 60 seconds |
| 1. DESC Method |
| 1. The 3 Gs |
| 1. The 5 Ss |
| 1. Board with Sections |
| 1. Stand up Meeting |
| 1. Ishikawa |
| 1. The 5 why’s |
| 1. WWWWHW |
| 1. PDCA |
| 1. Contextual Briefing (aviation) |
| 1. FORDEC (aviation) |
| 1. Debrief in 60 seconds (aviation) |

**Supplementary Figure 1.** Program Satisfaction Survey

**
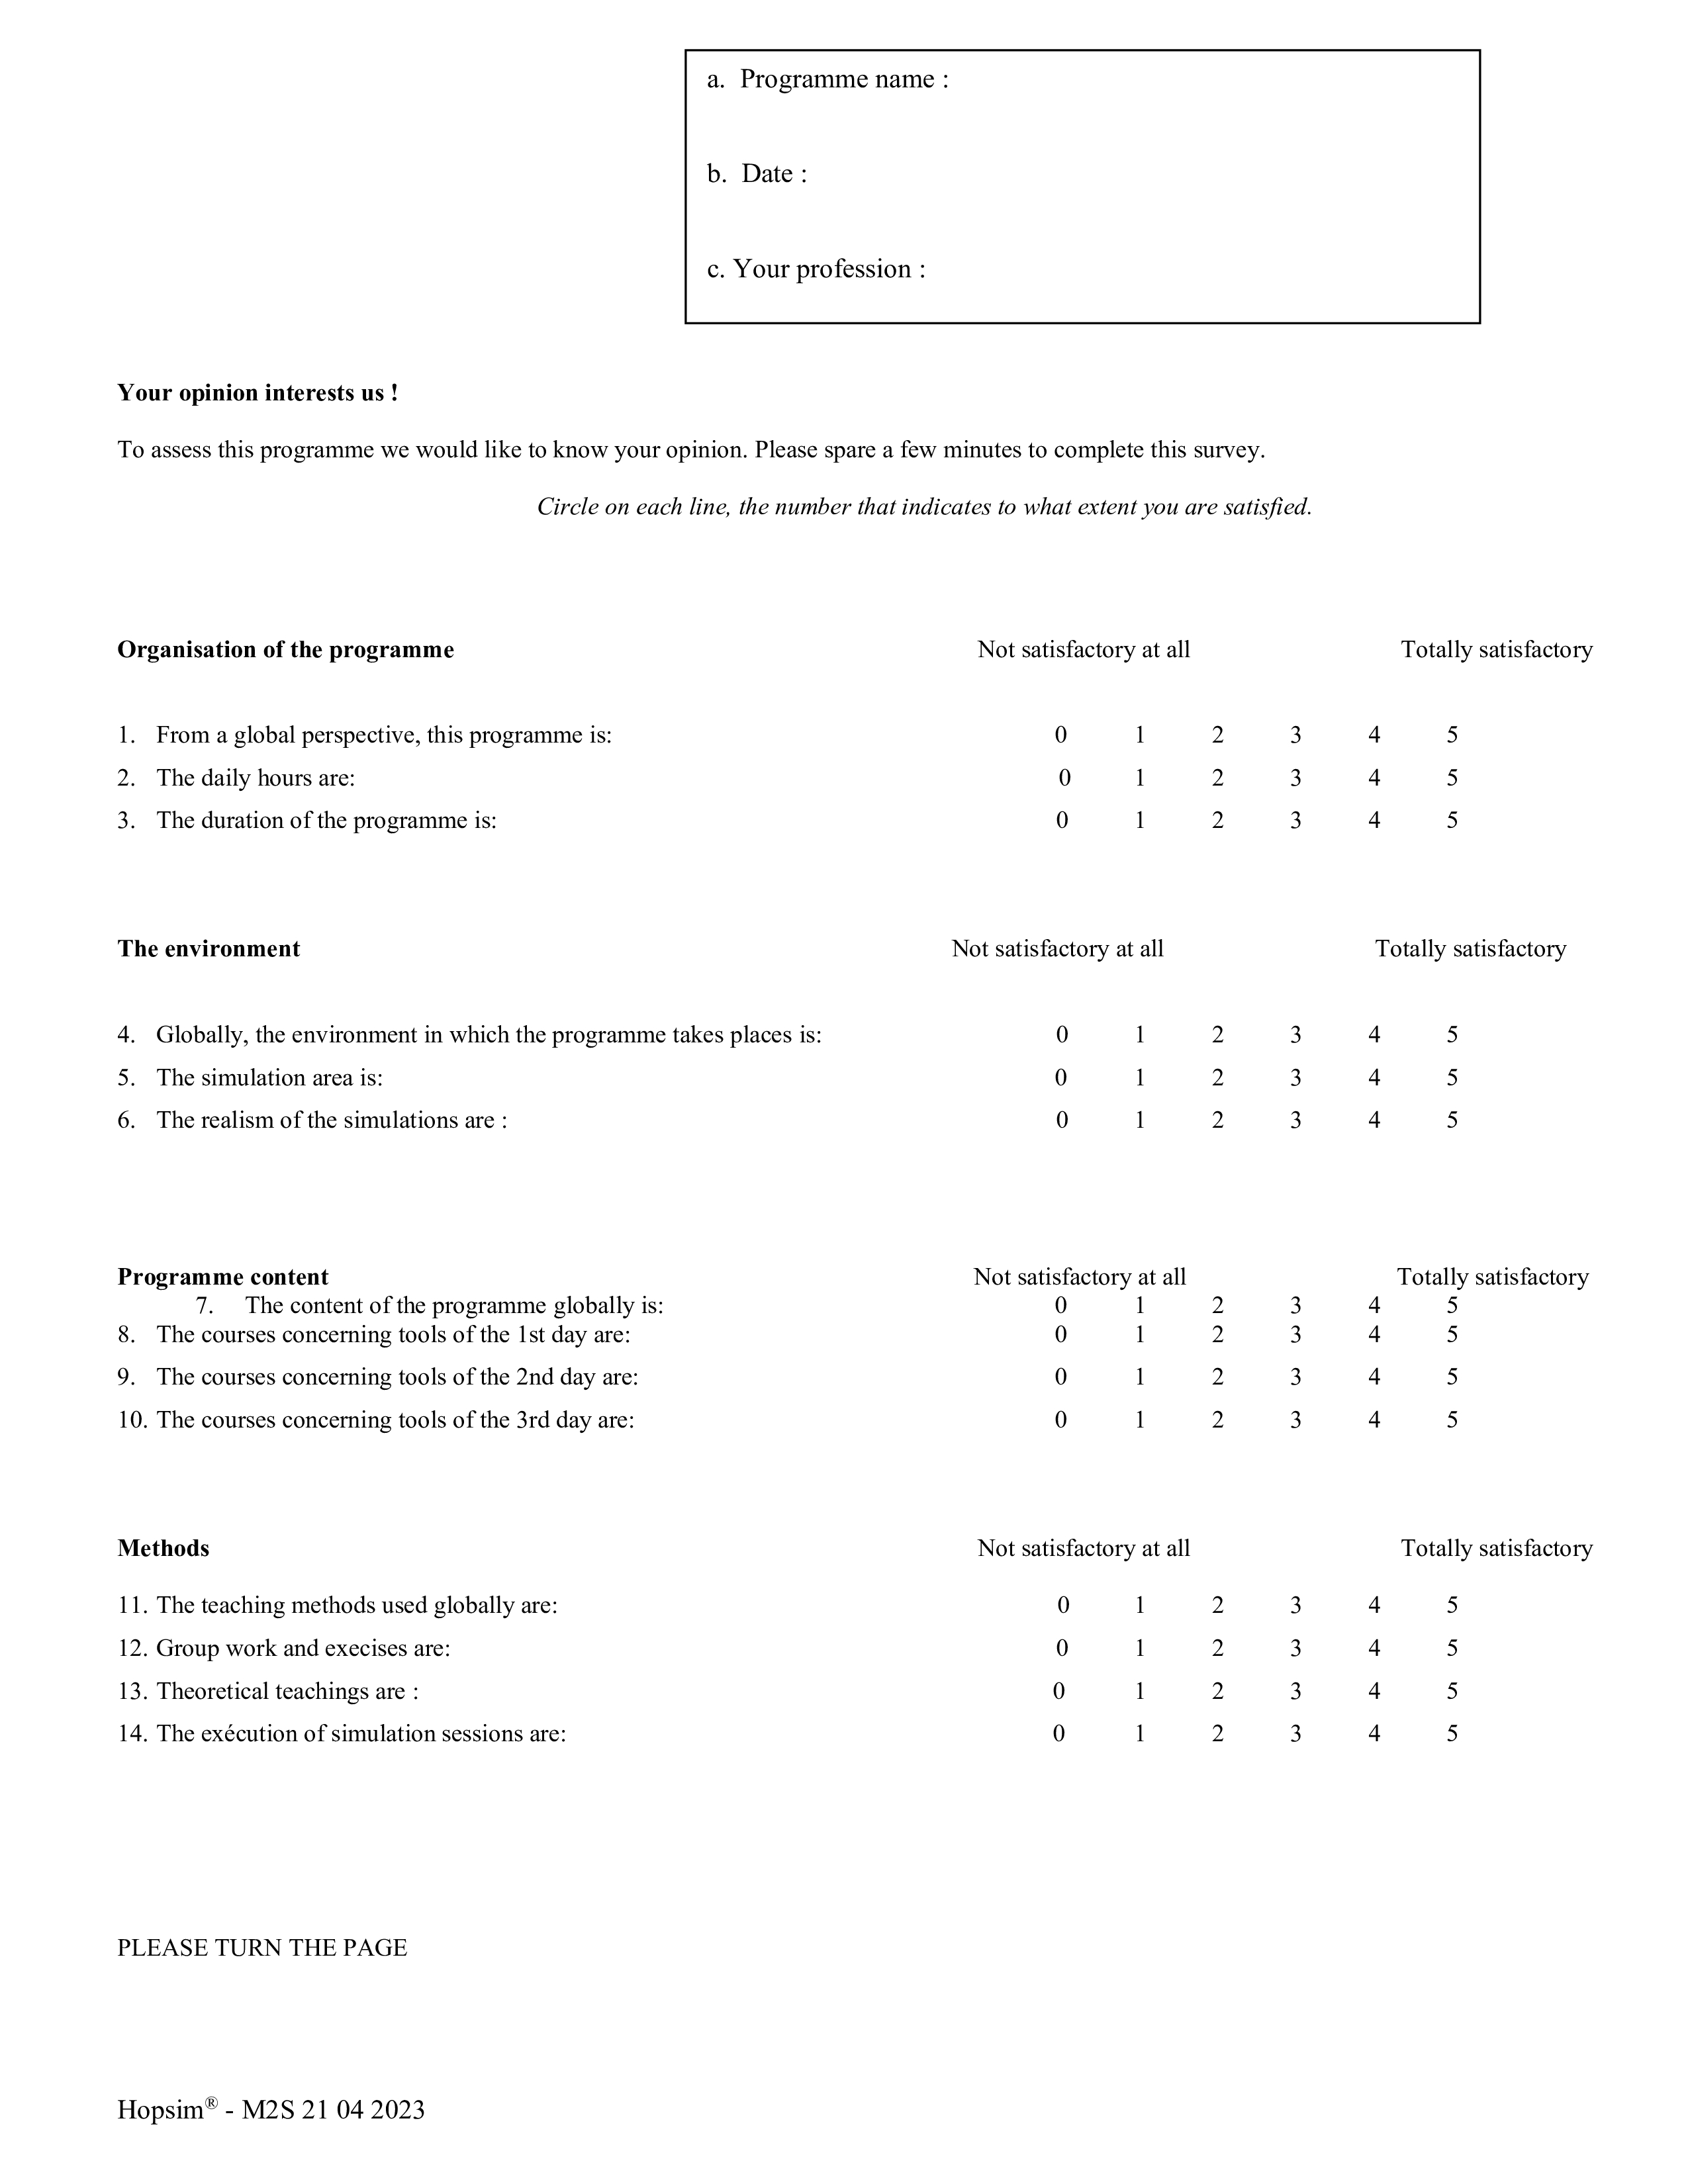
**

**
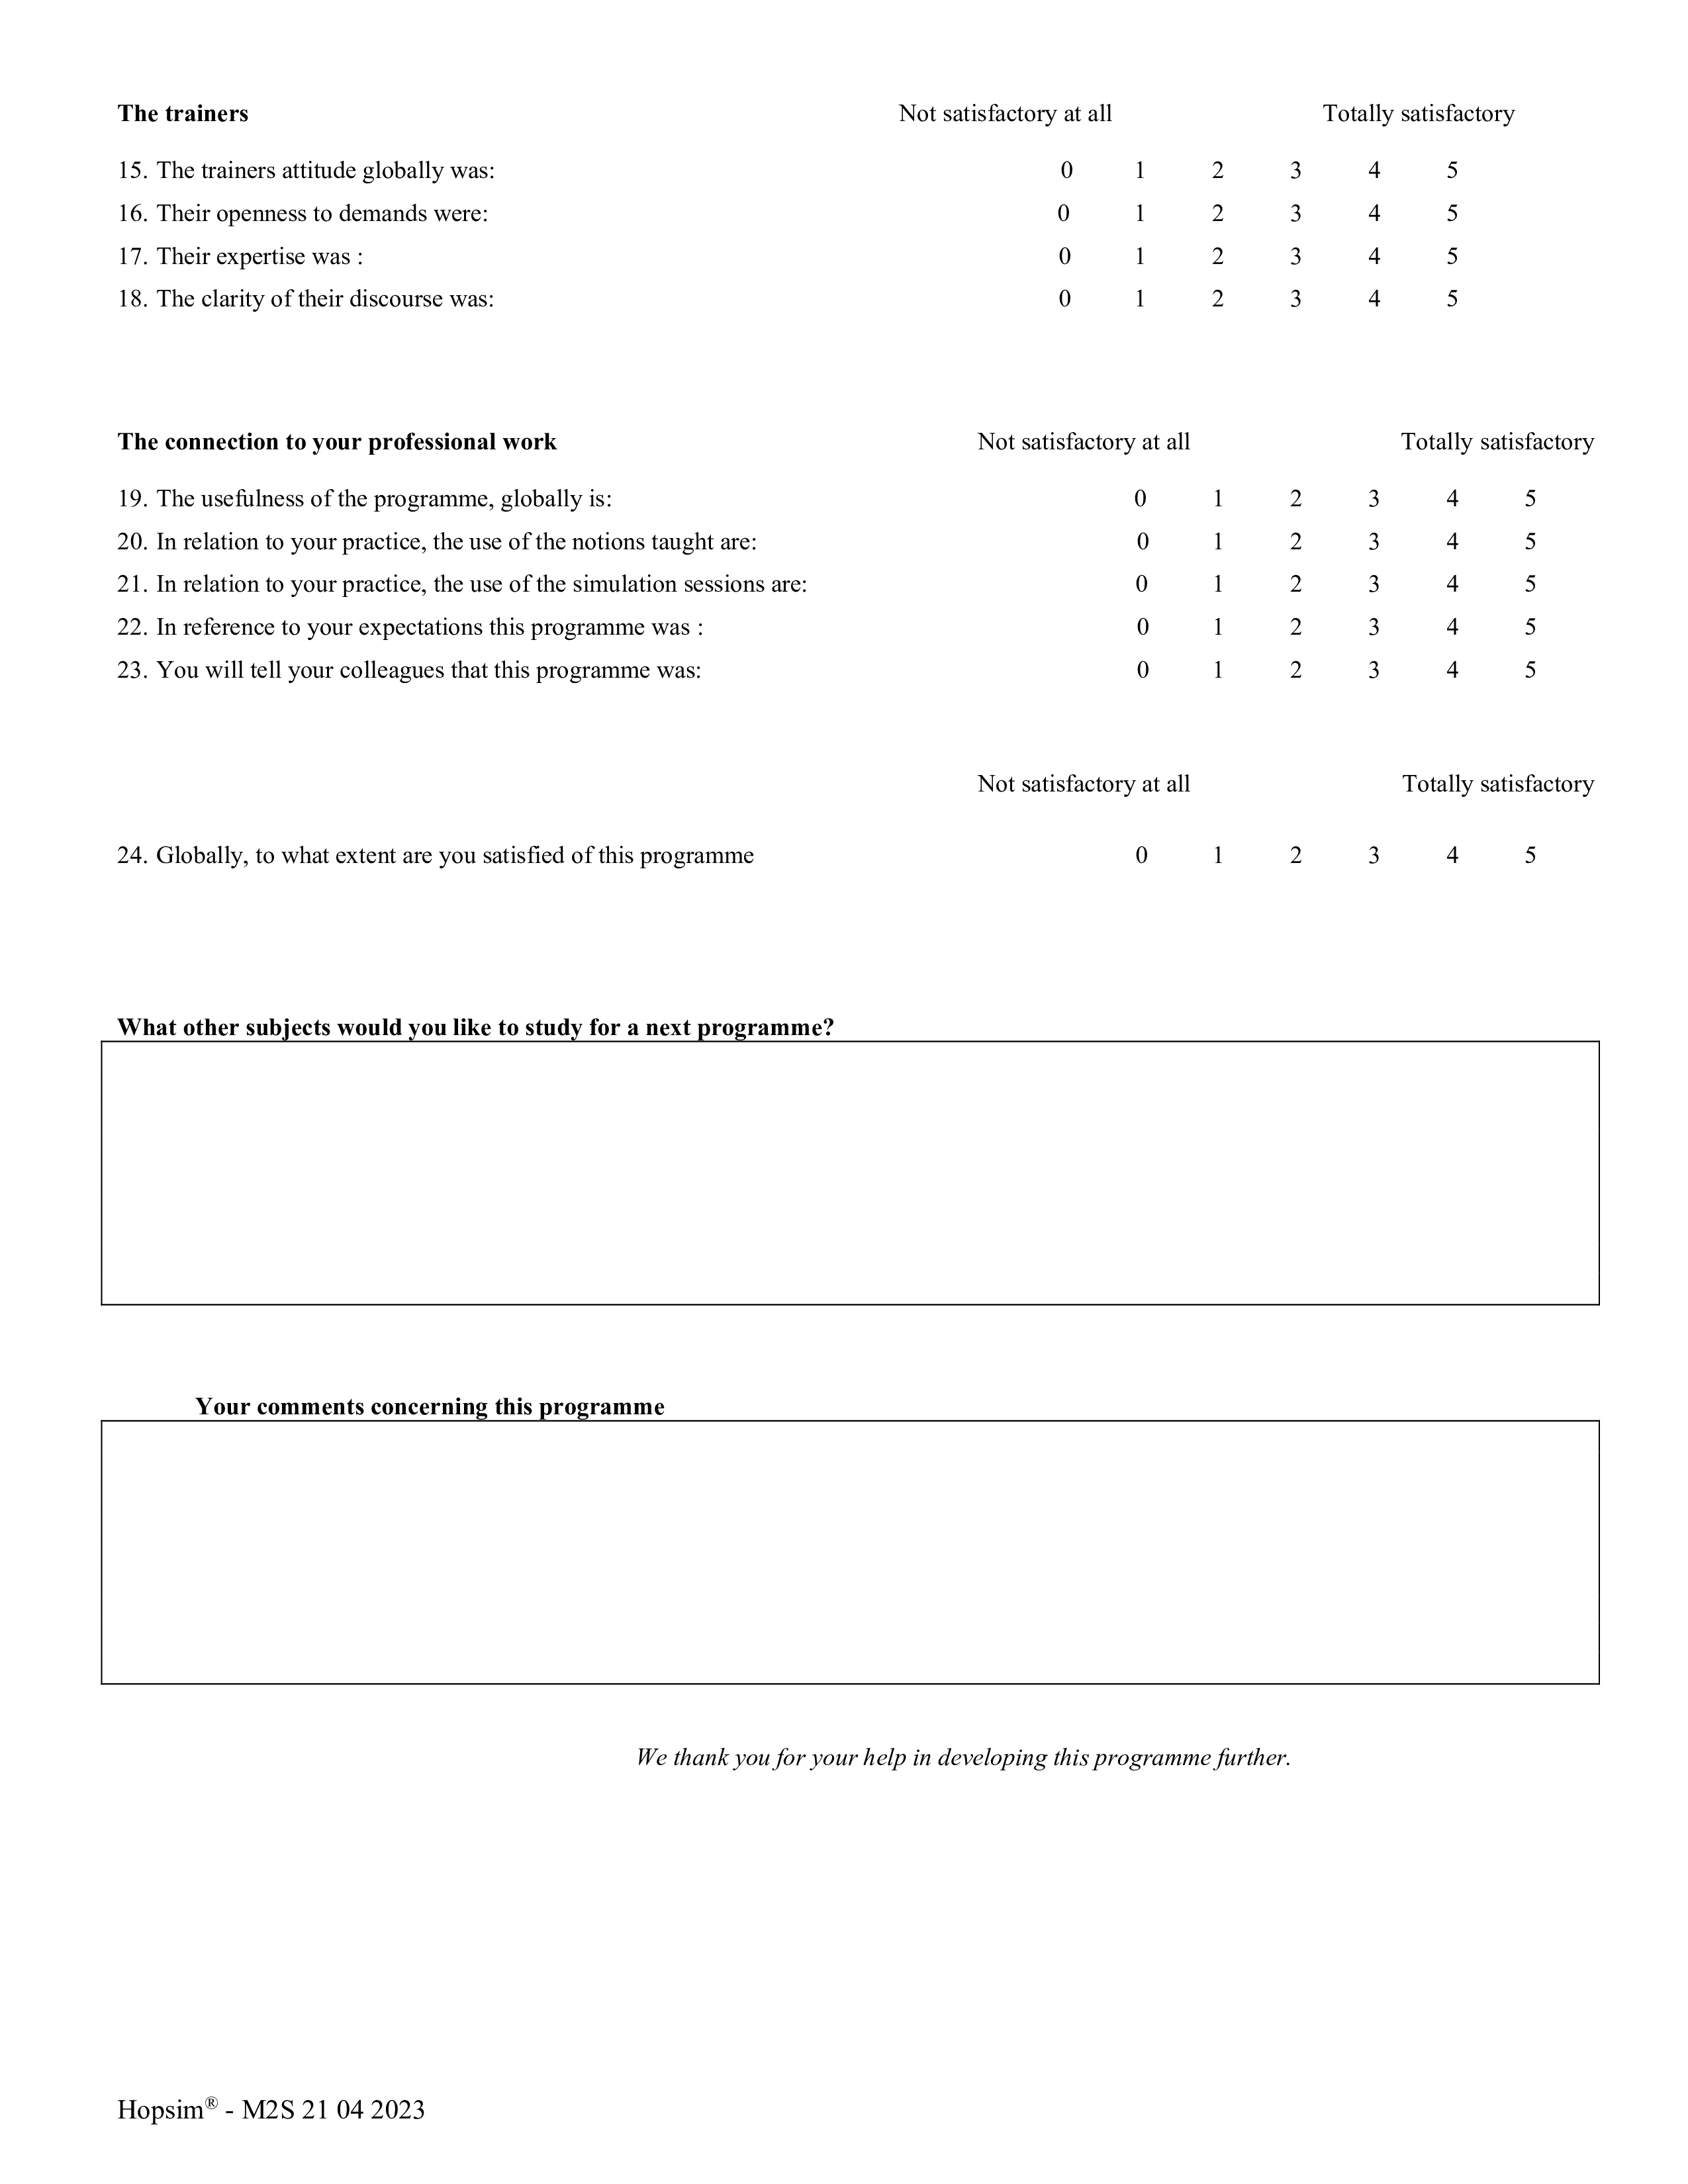
**

**Supplementary Figure 2.** Pre-training (T0) Leadership Self-efficacy Questionnaire

*
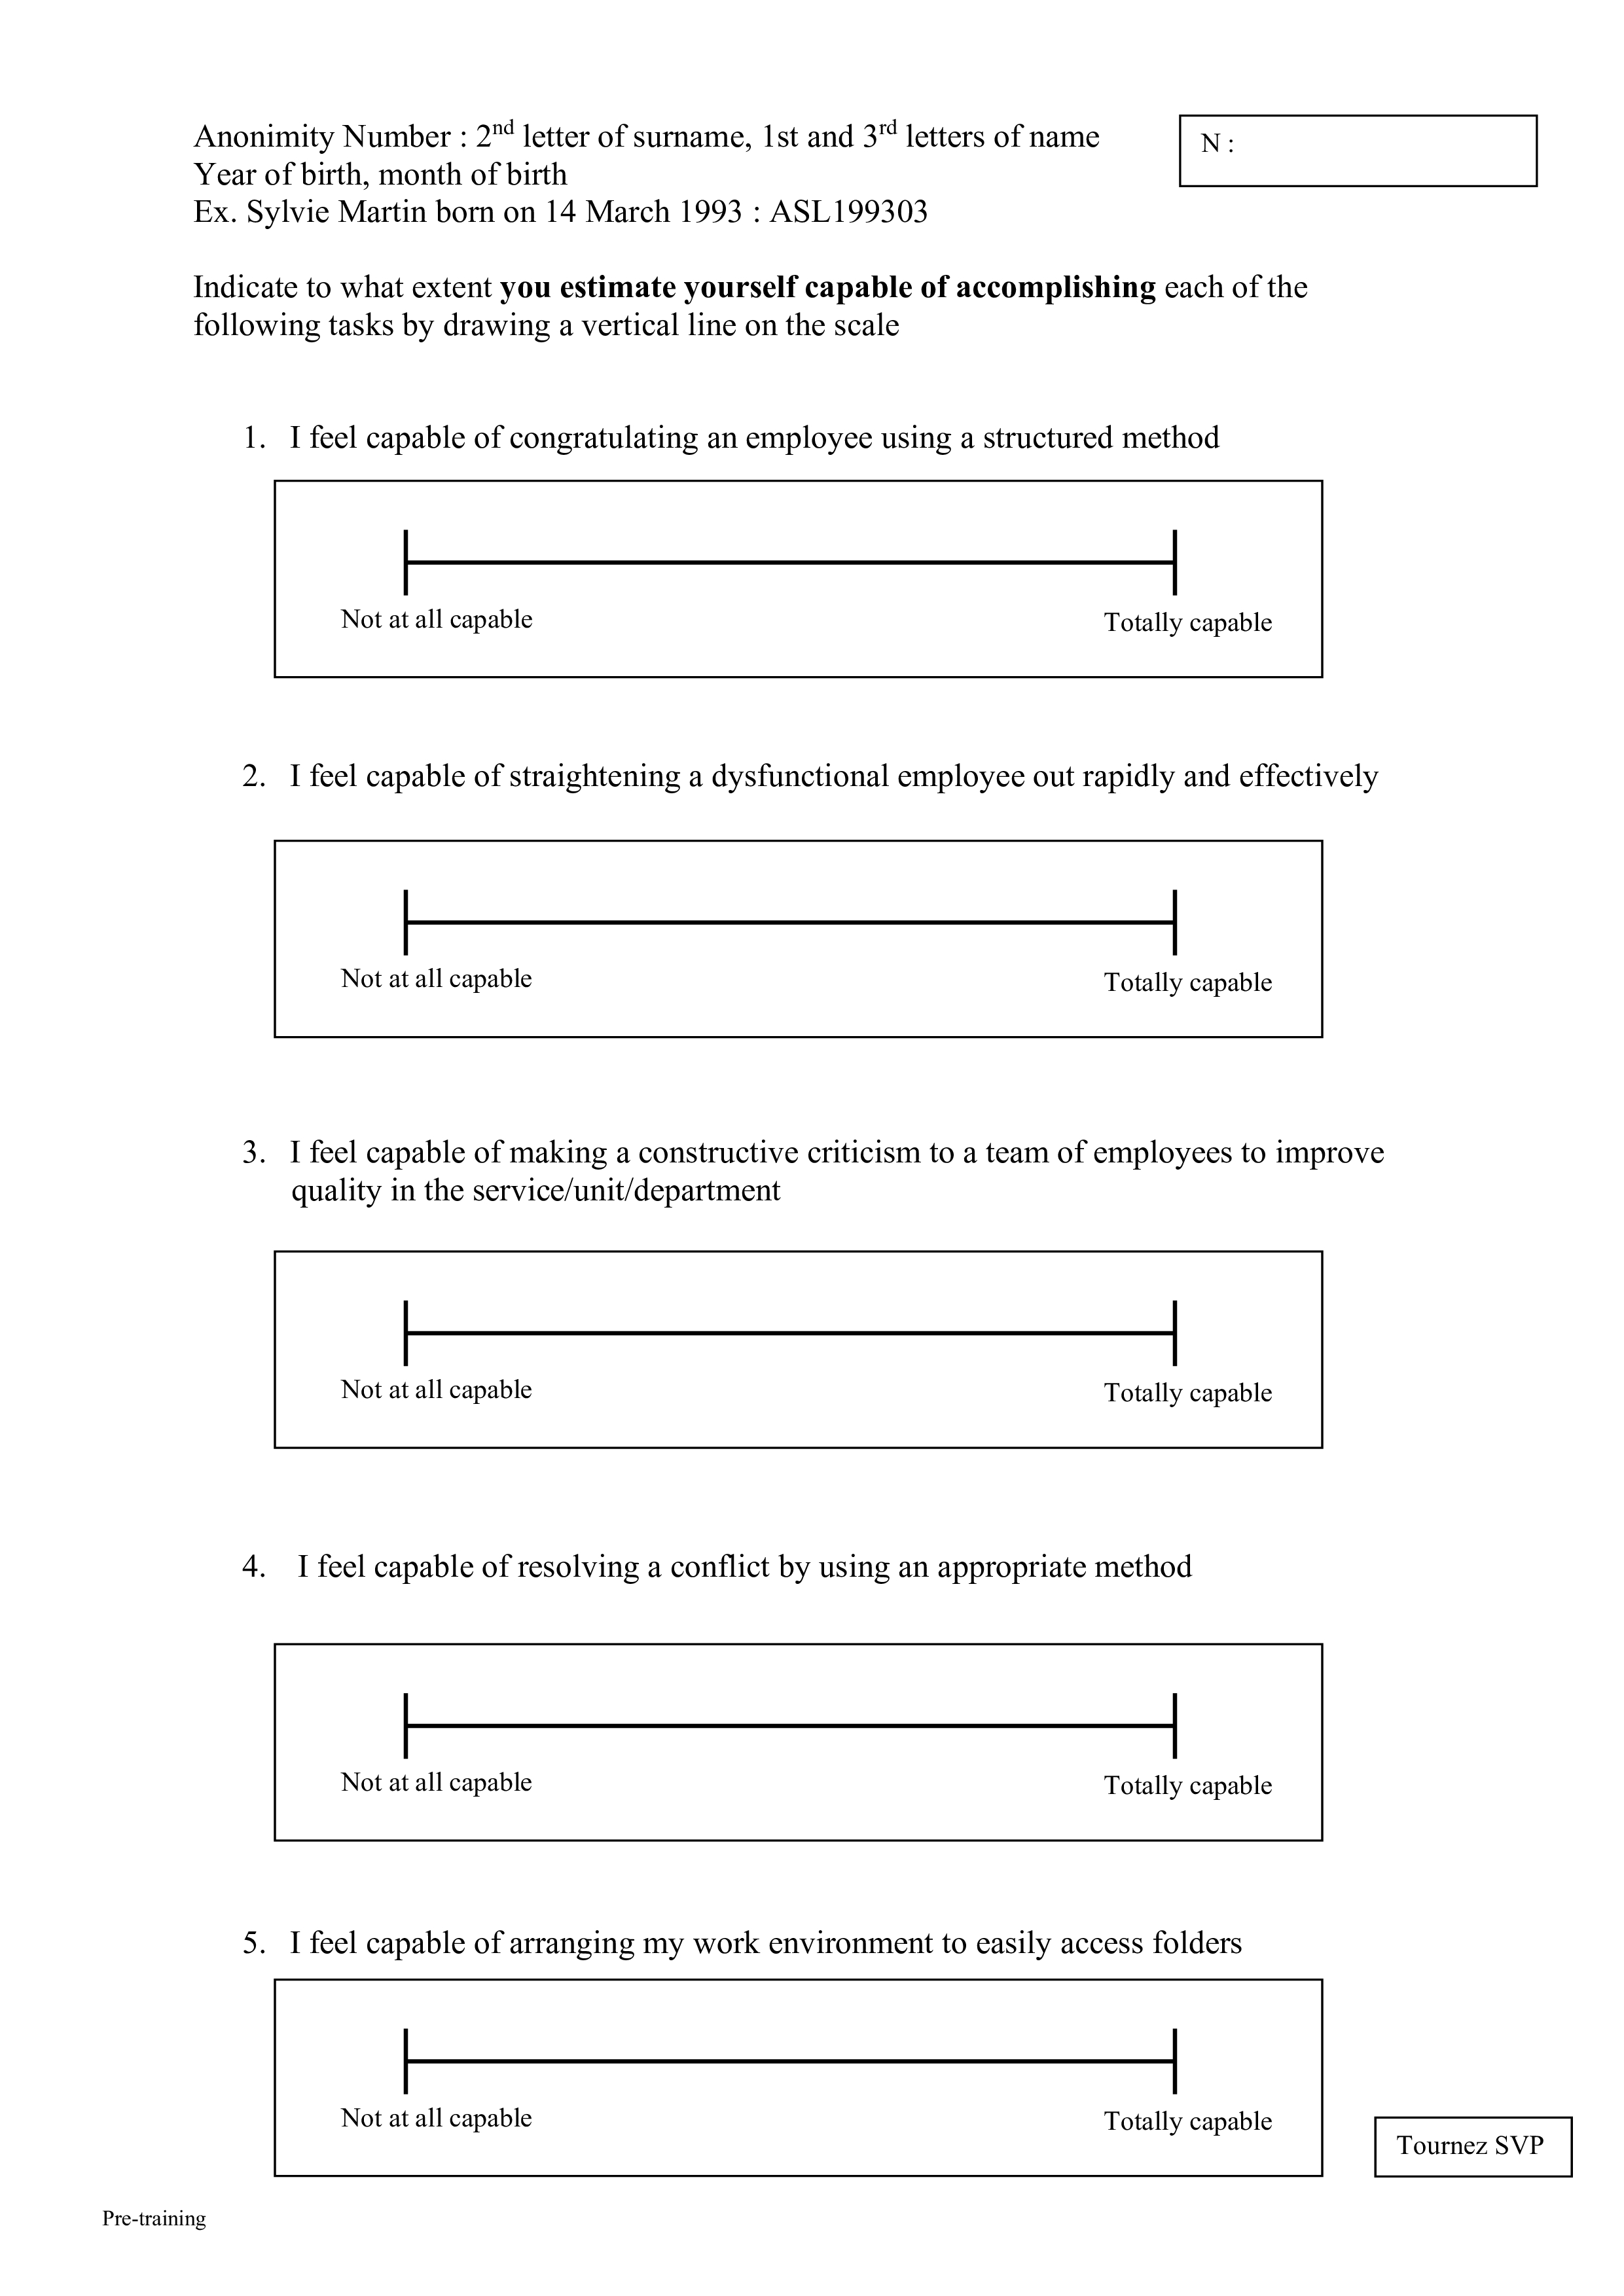
*

*
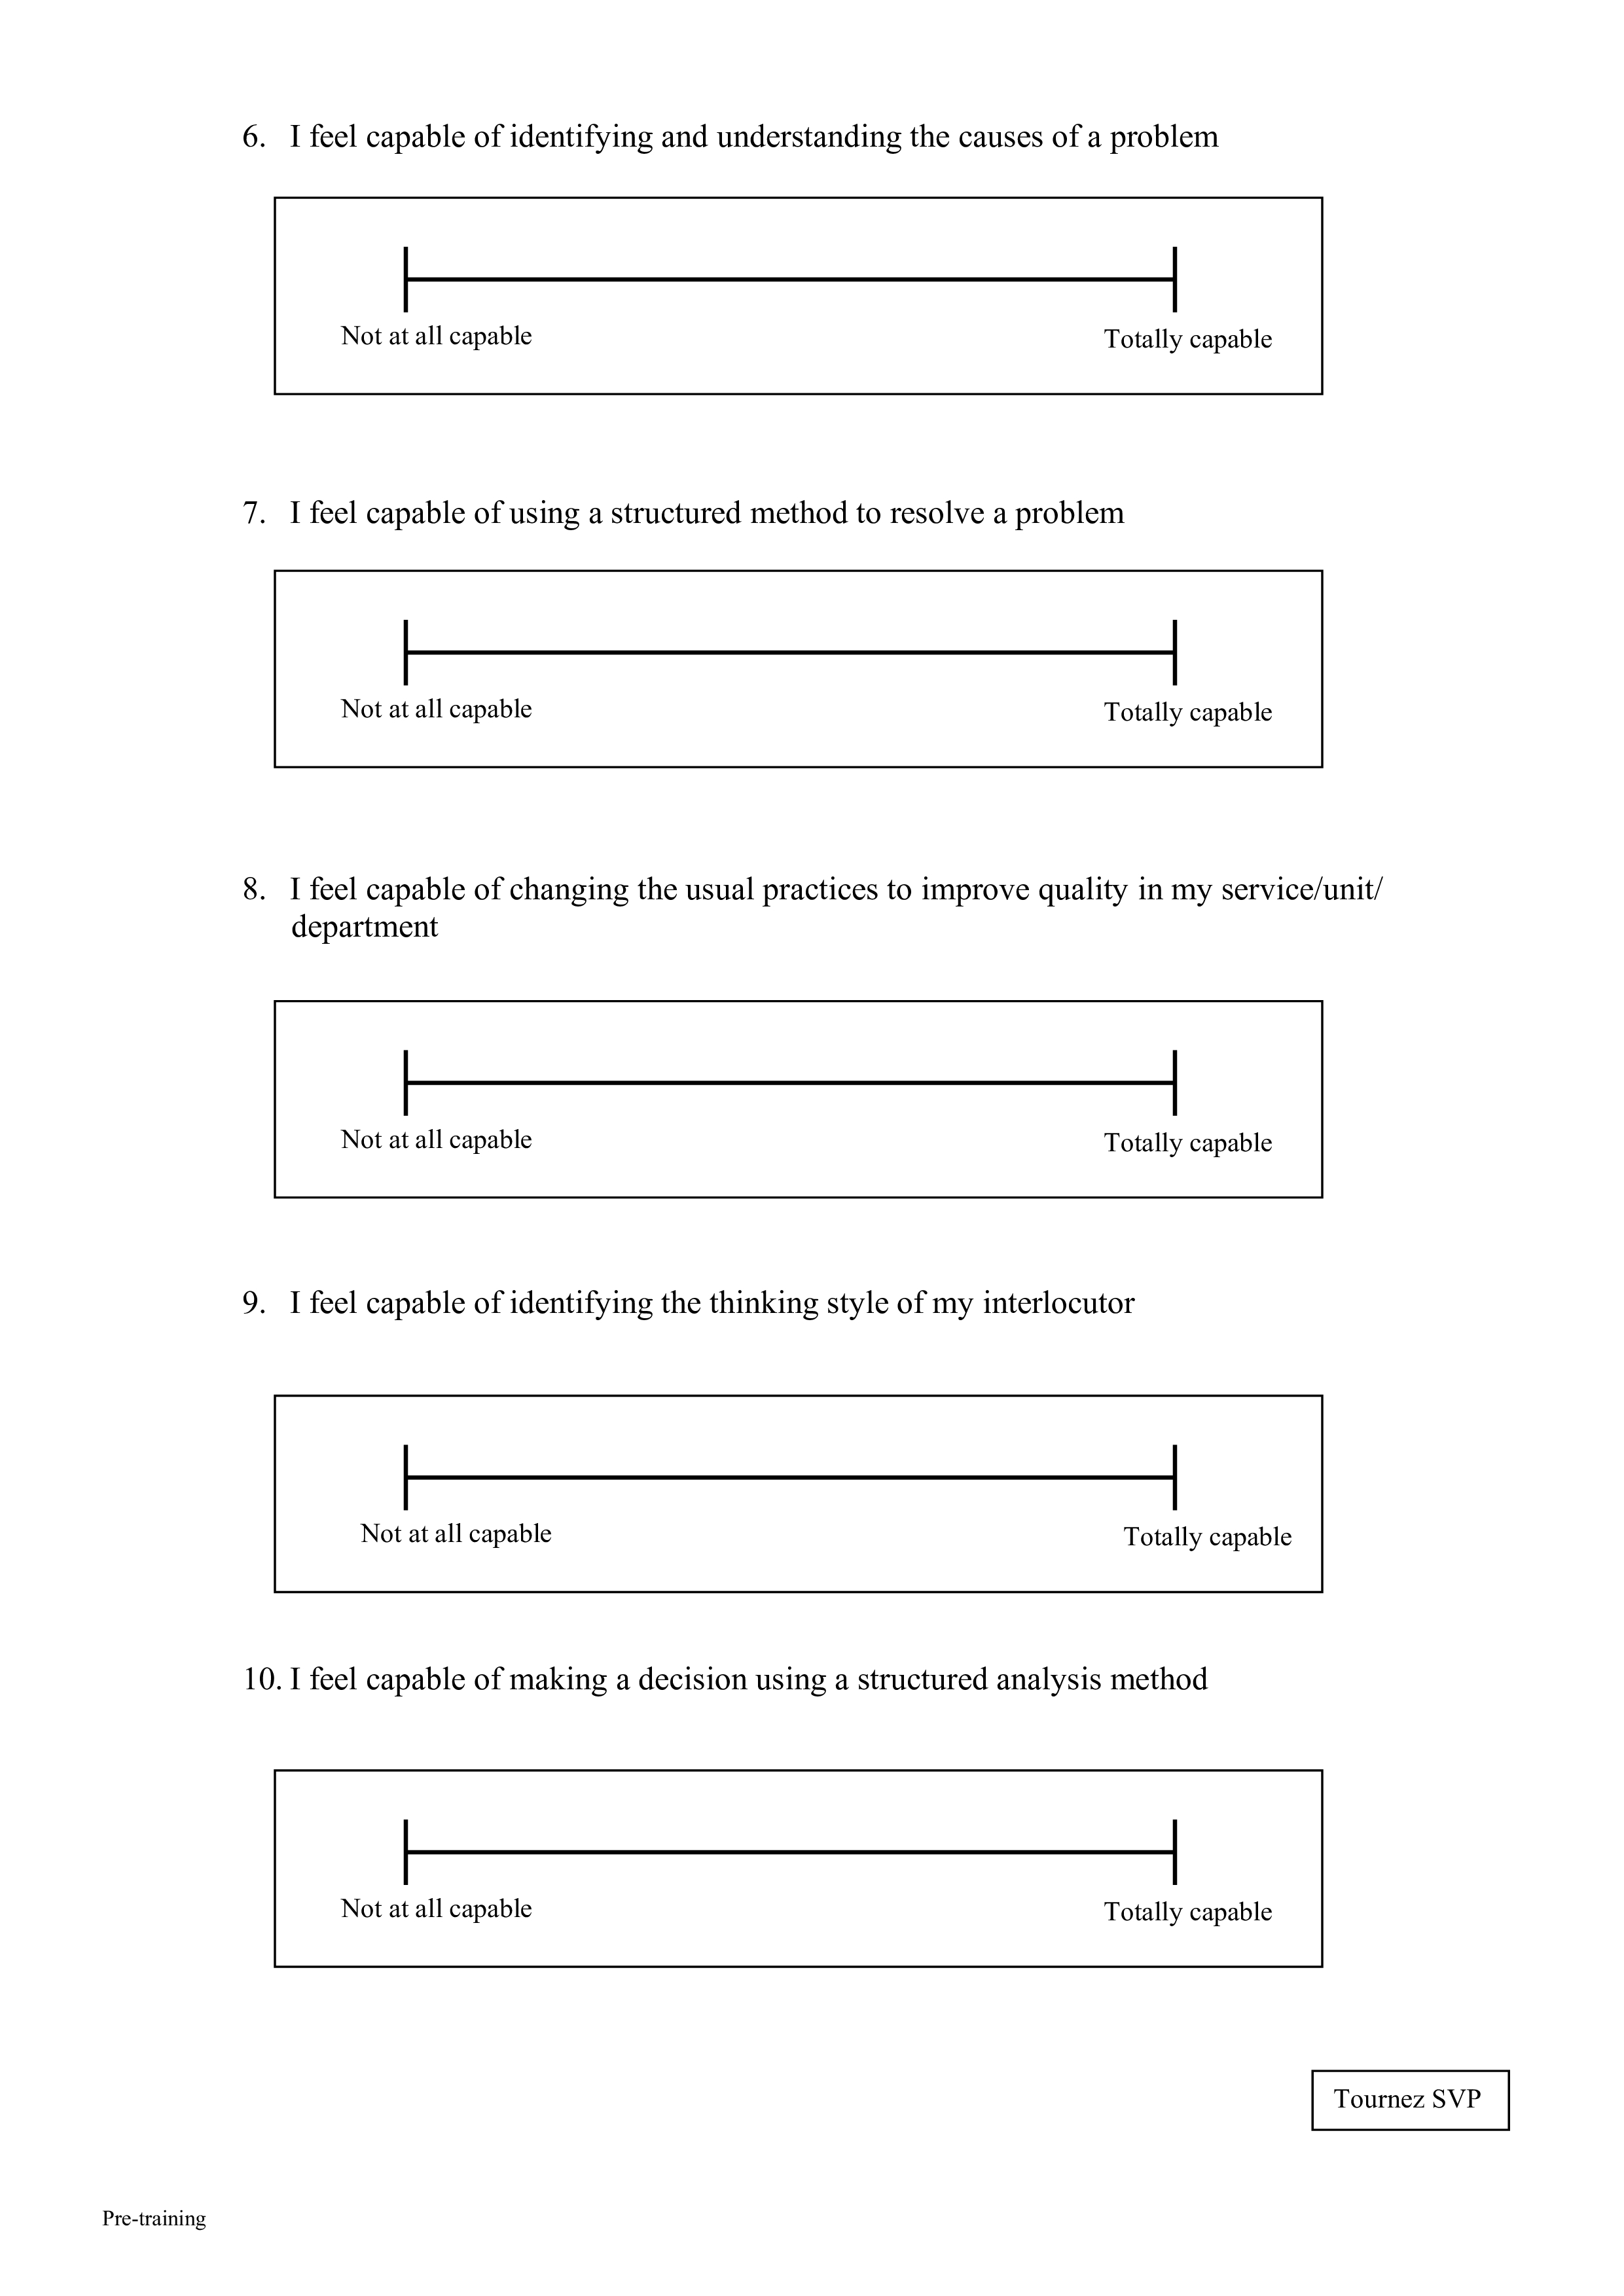
*

*
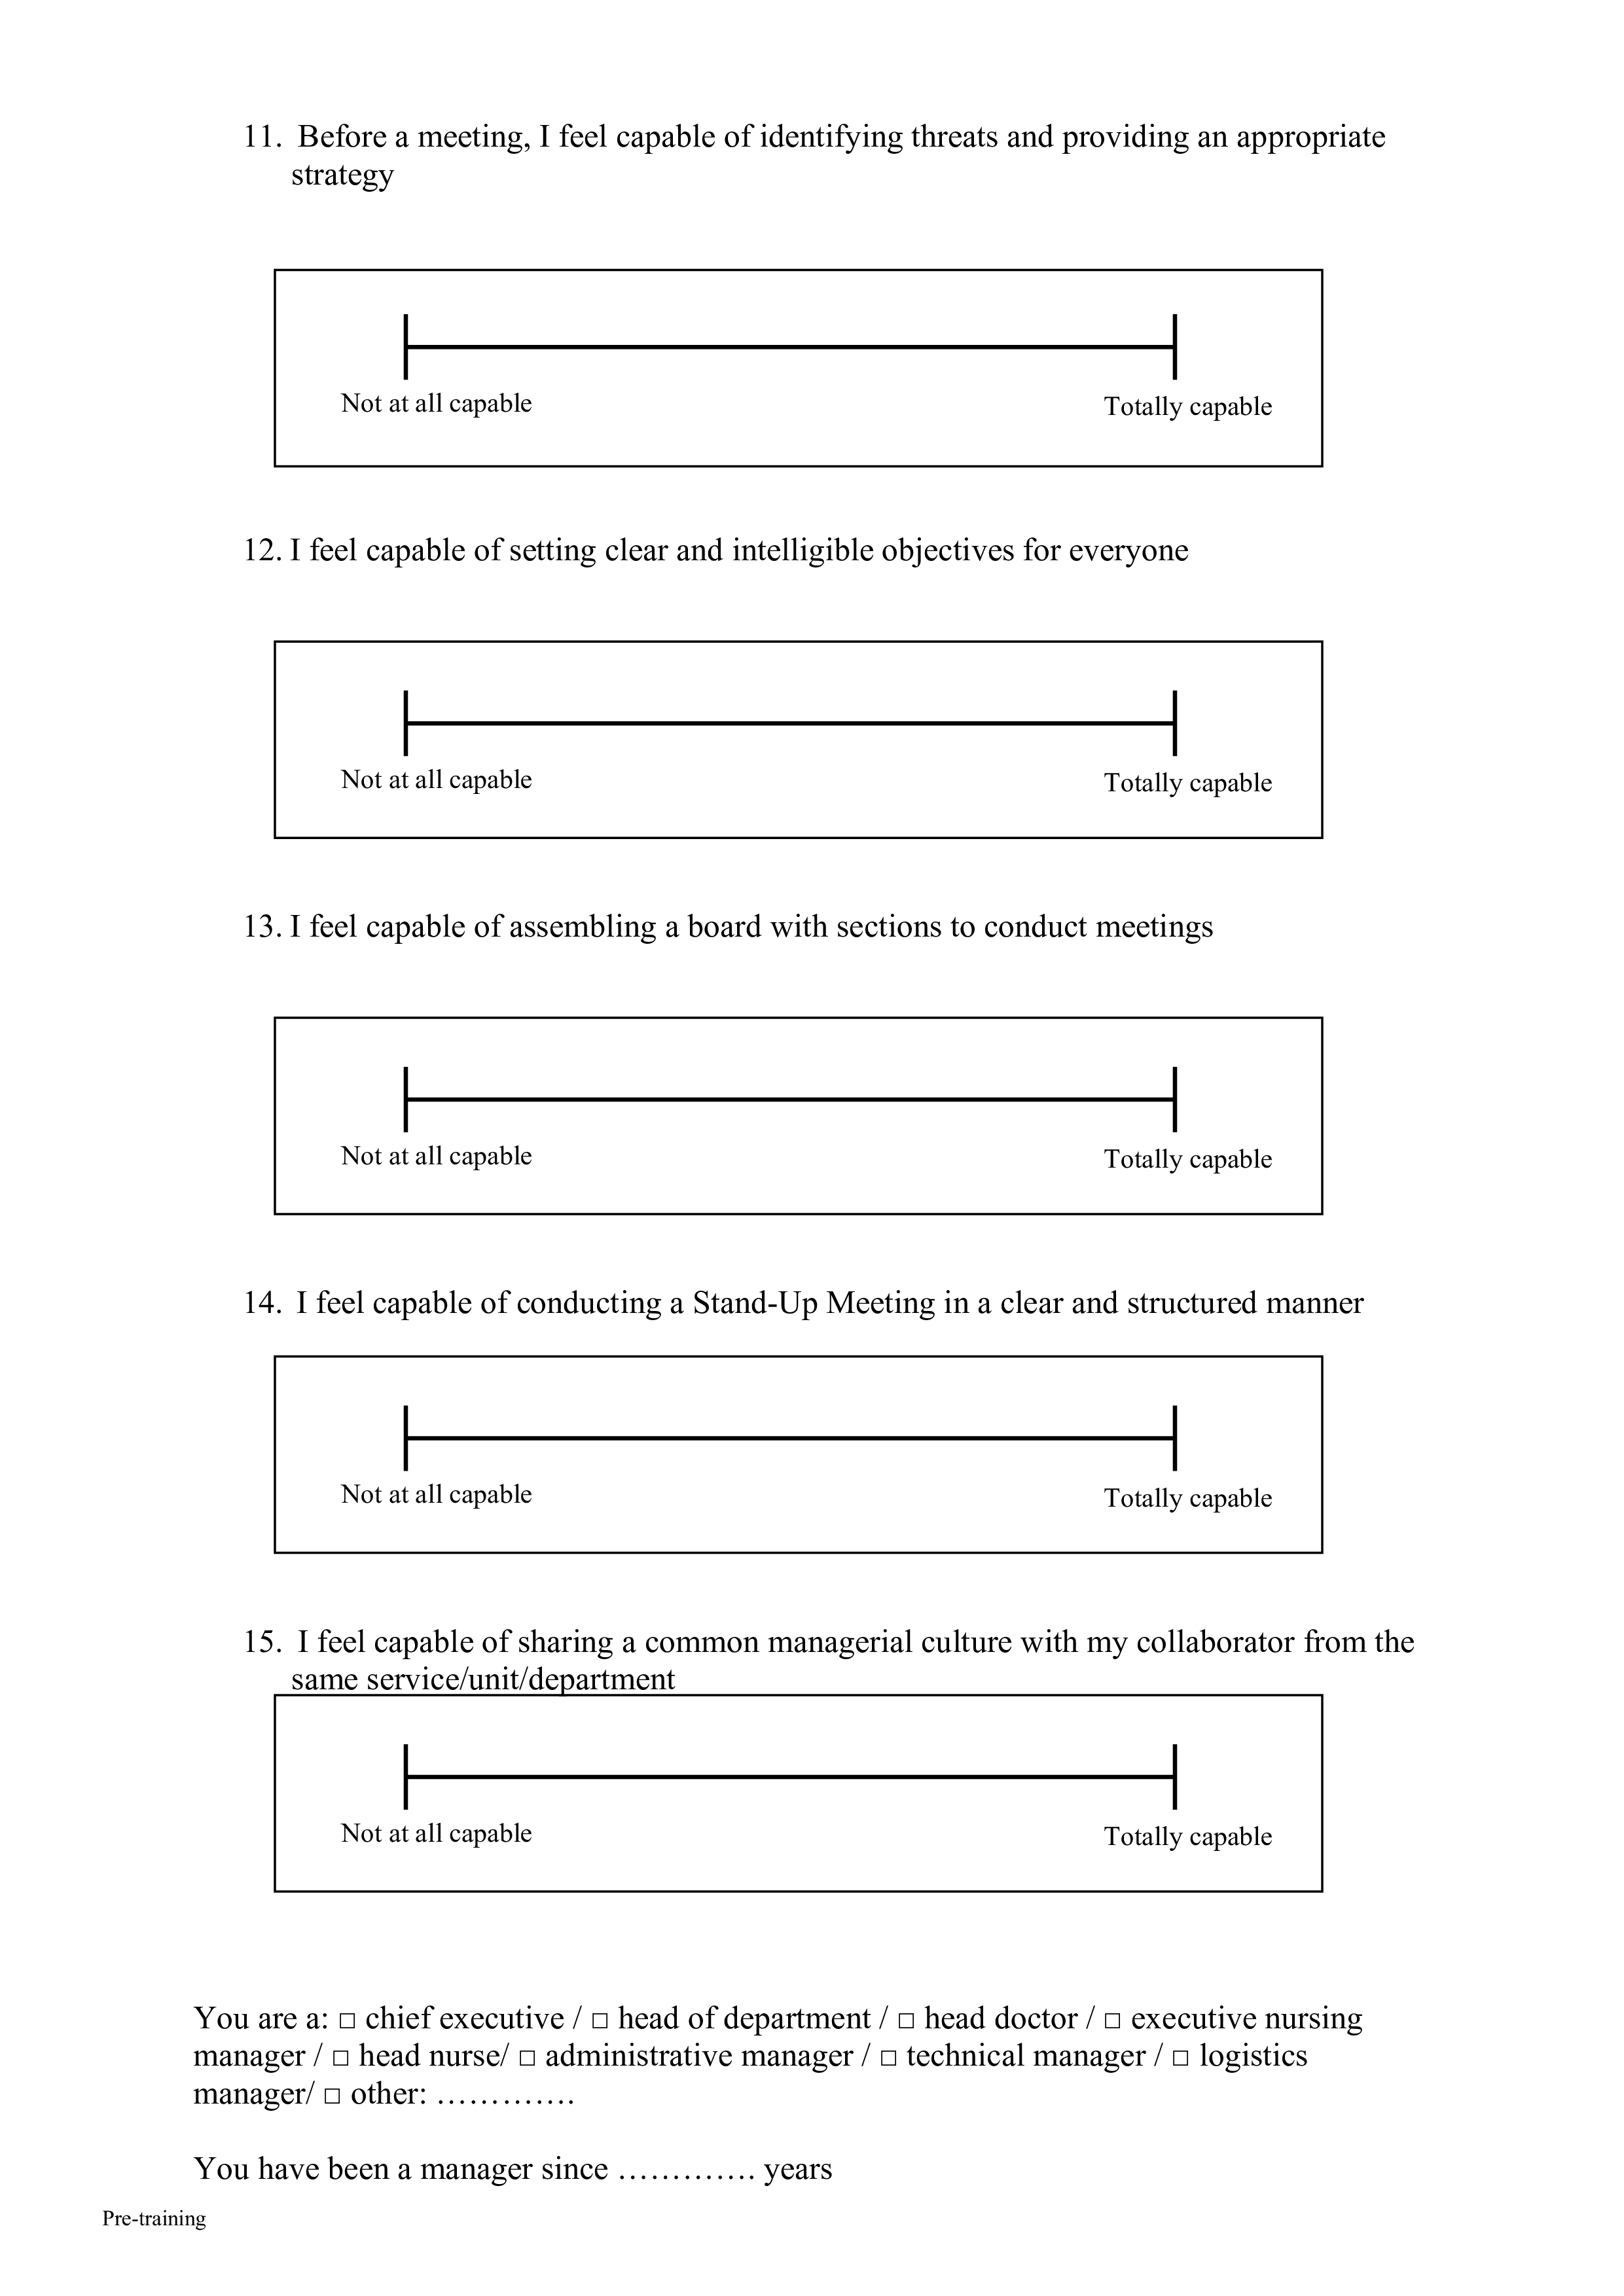
*

**Supplementary Figure 3.** Post-training (T1) Leadership Self-efficacy Questionnaire


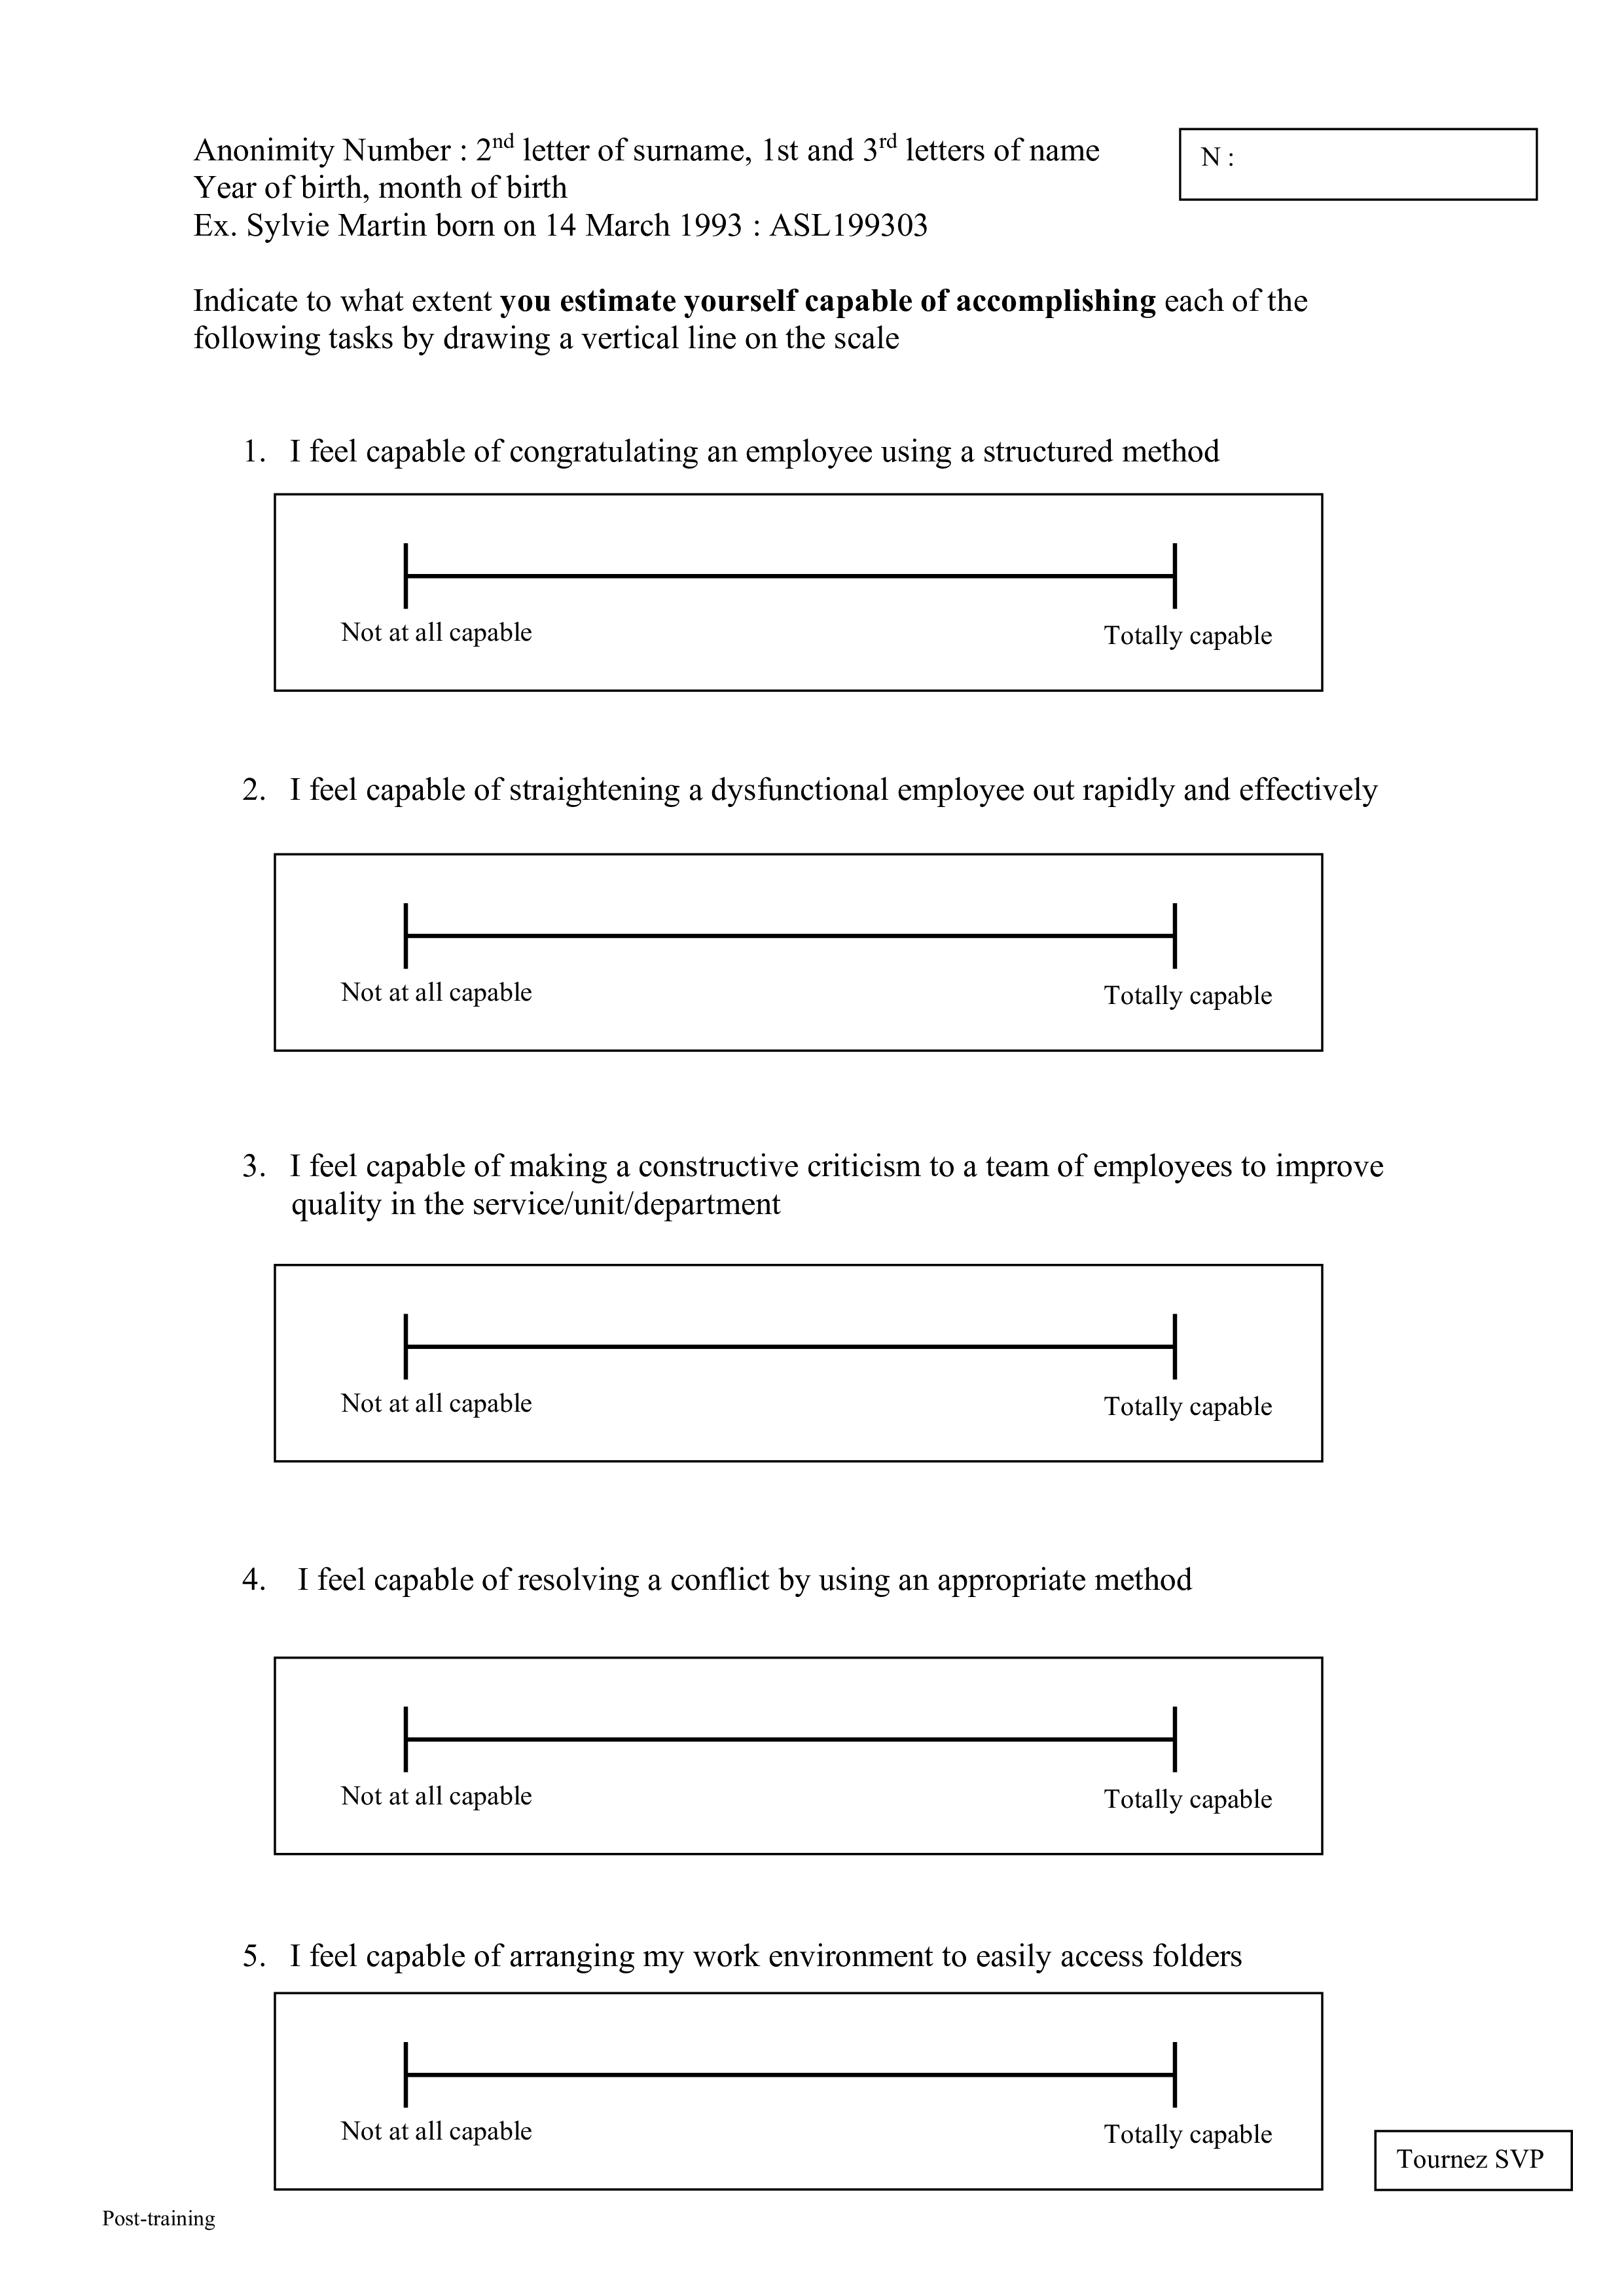


*
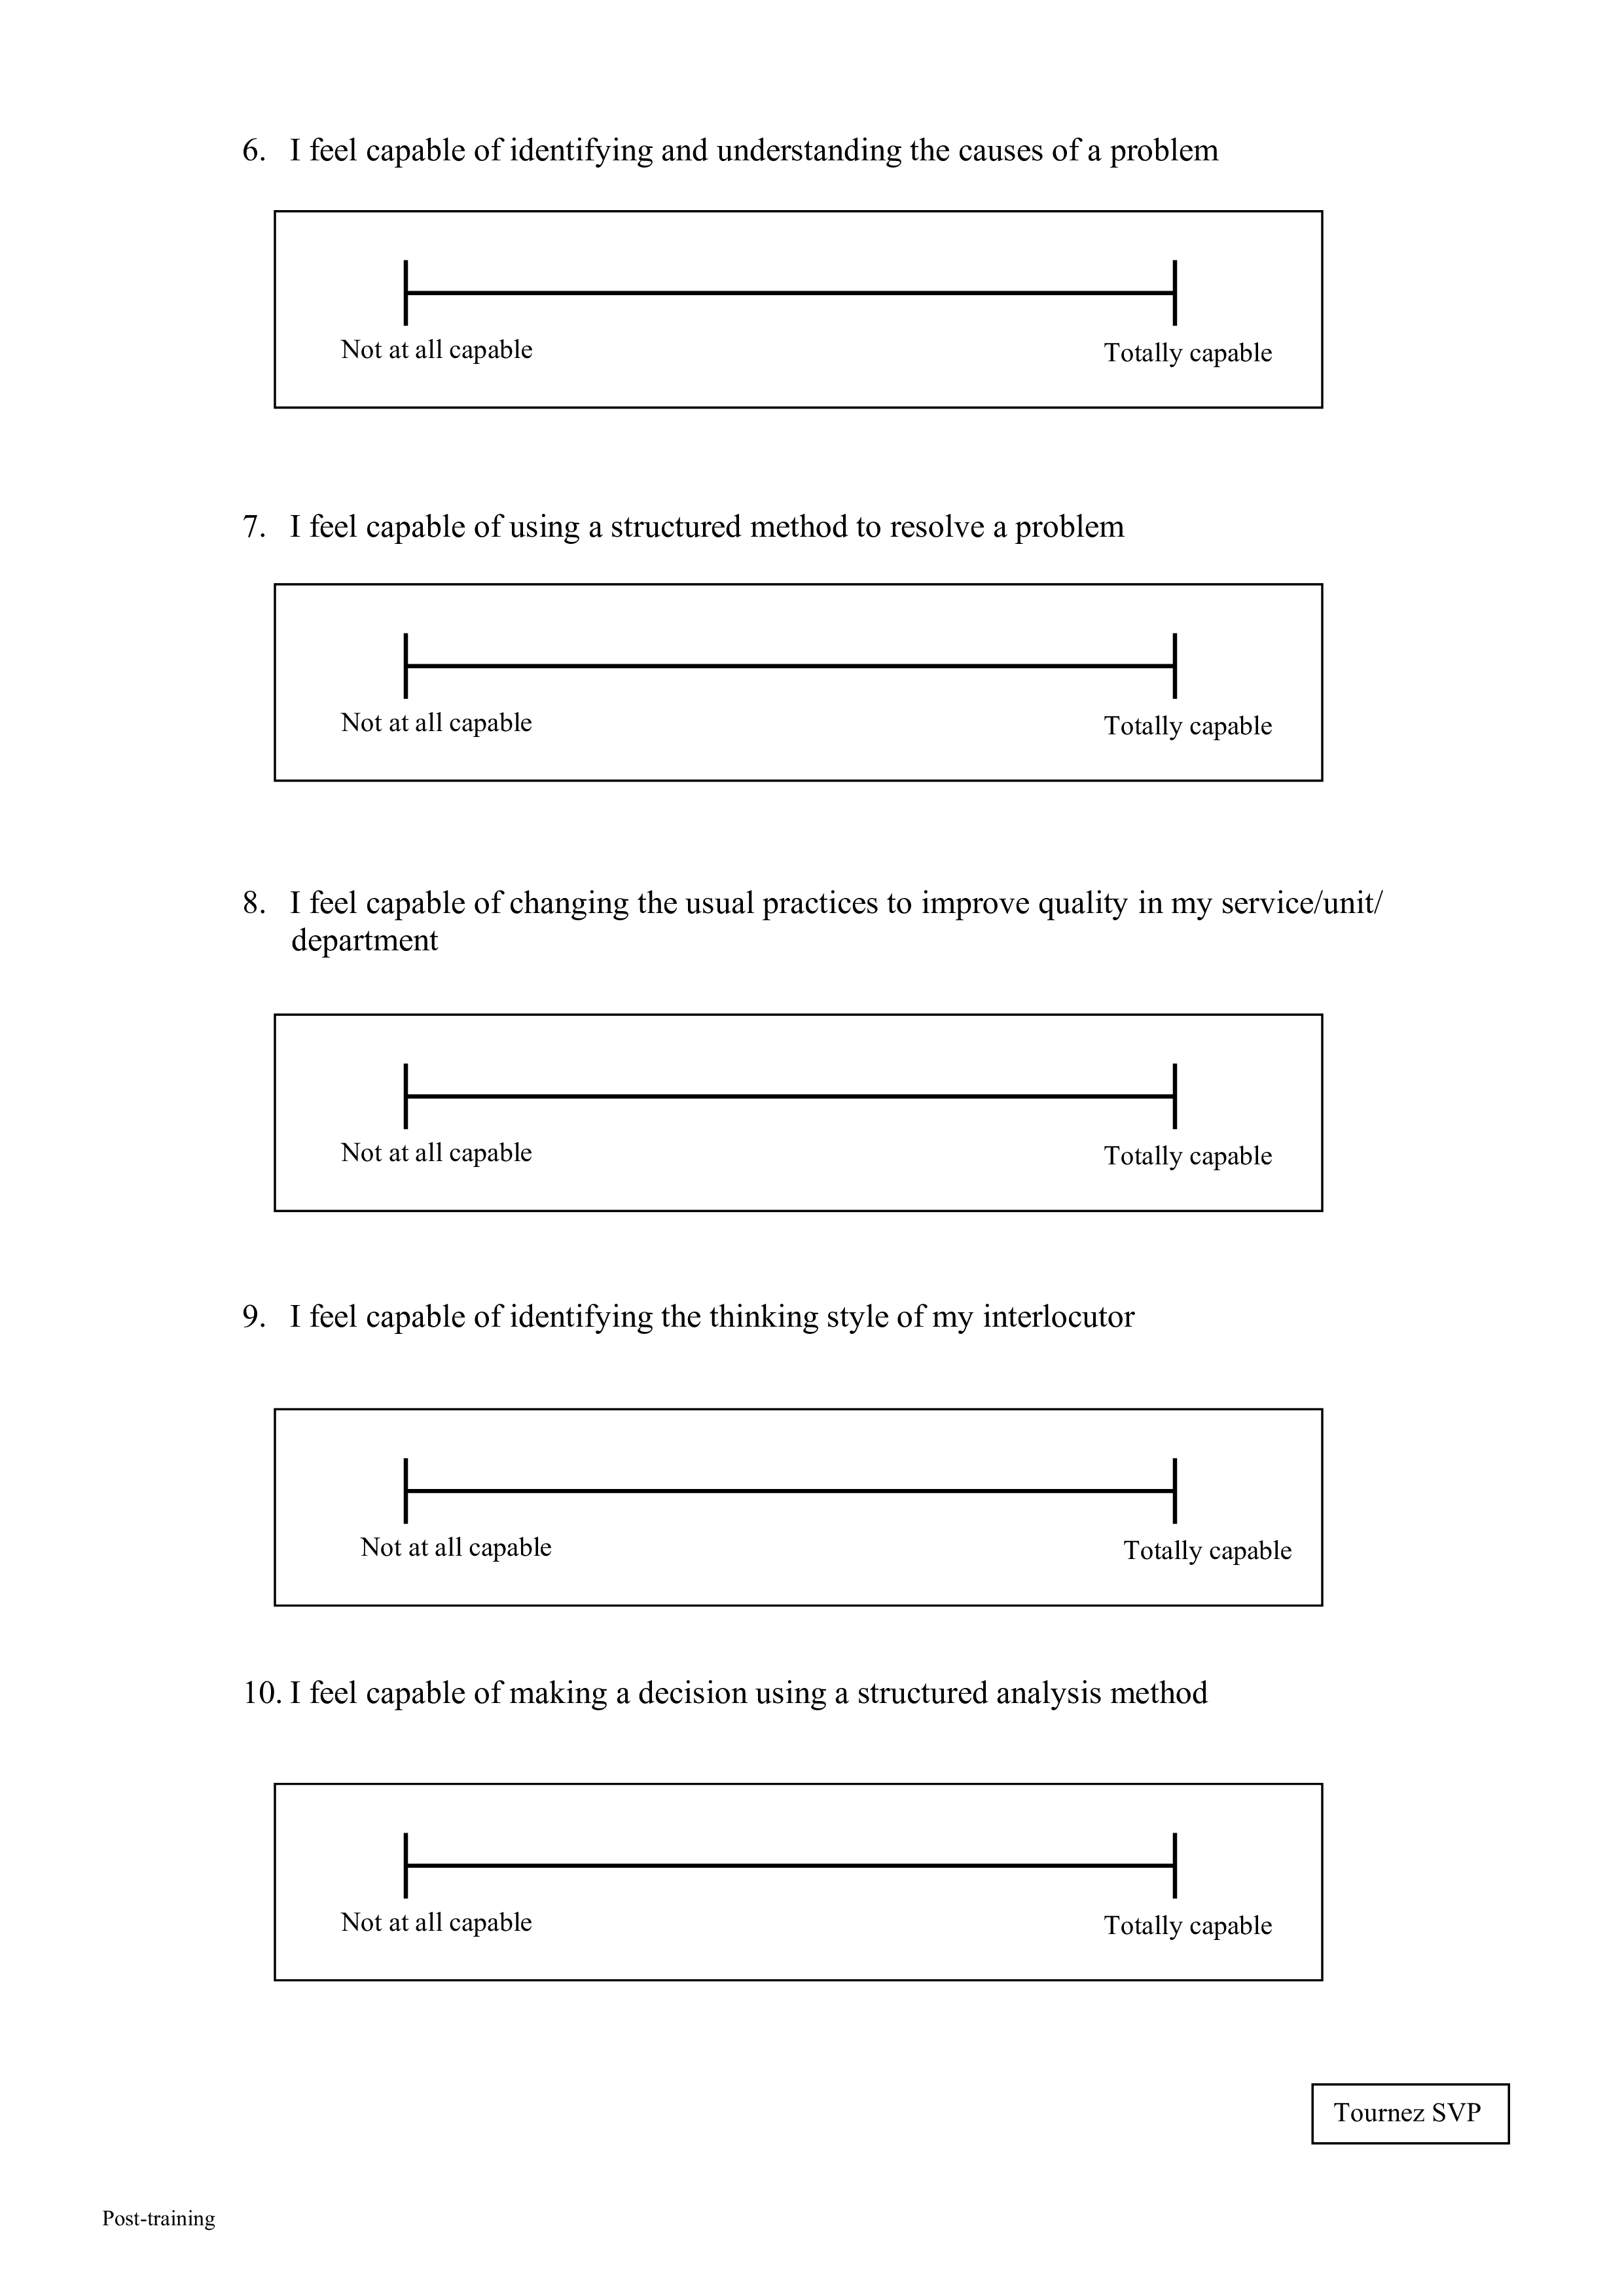
*

*
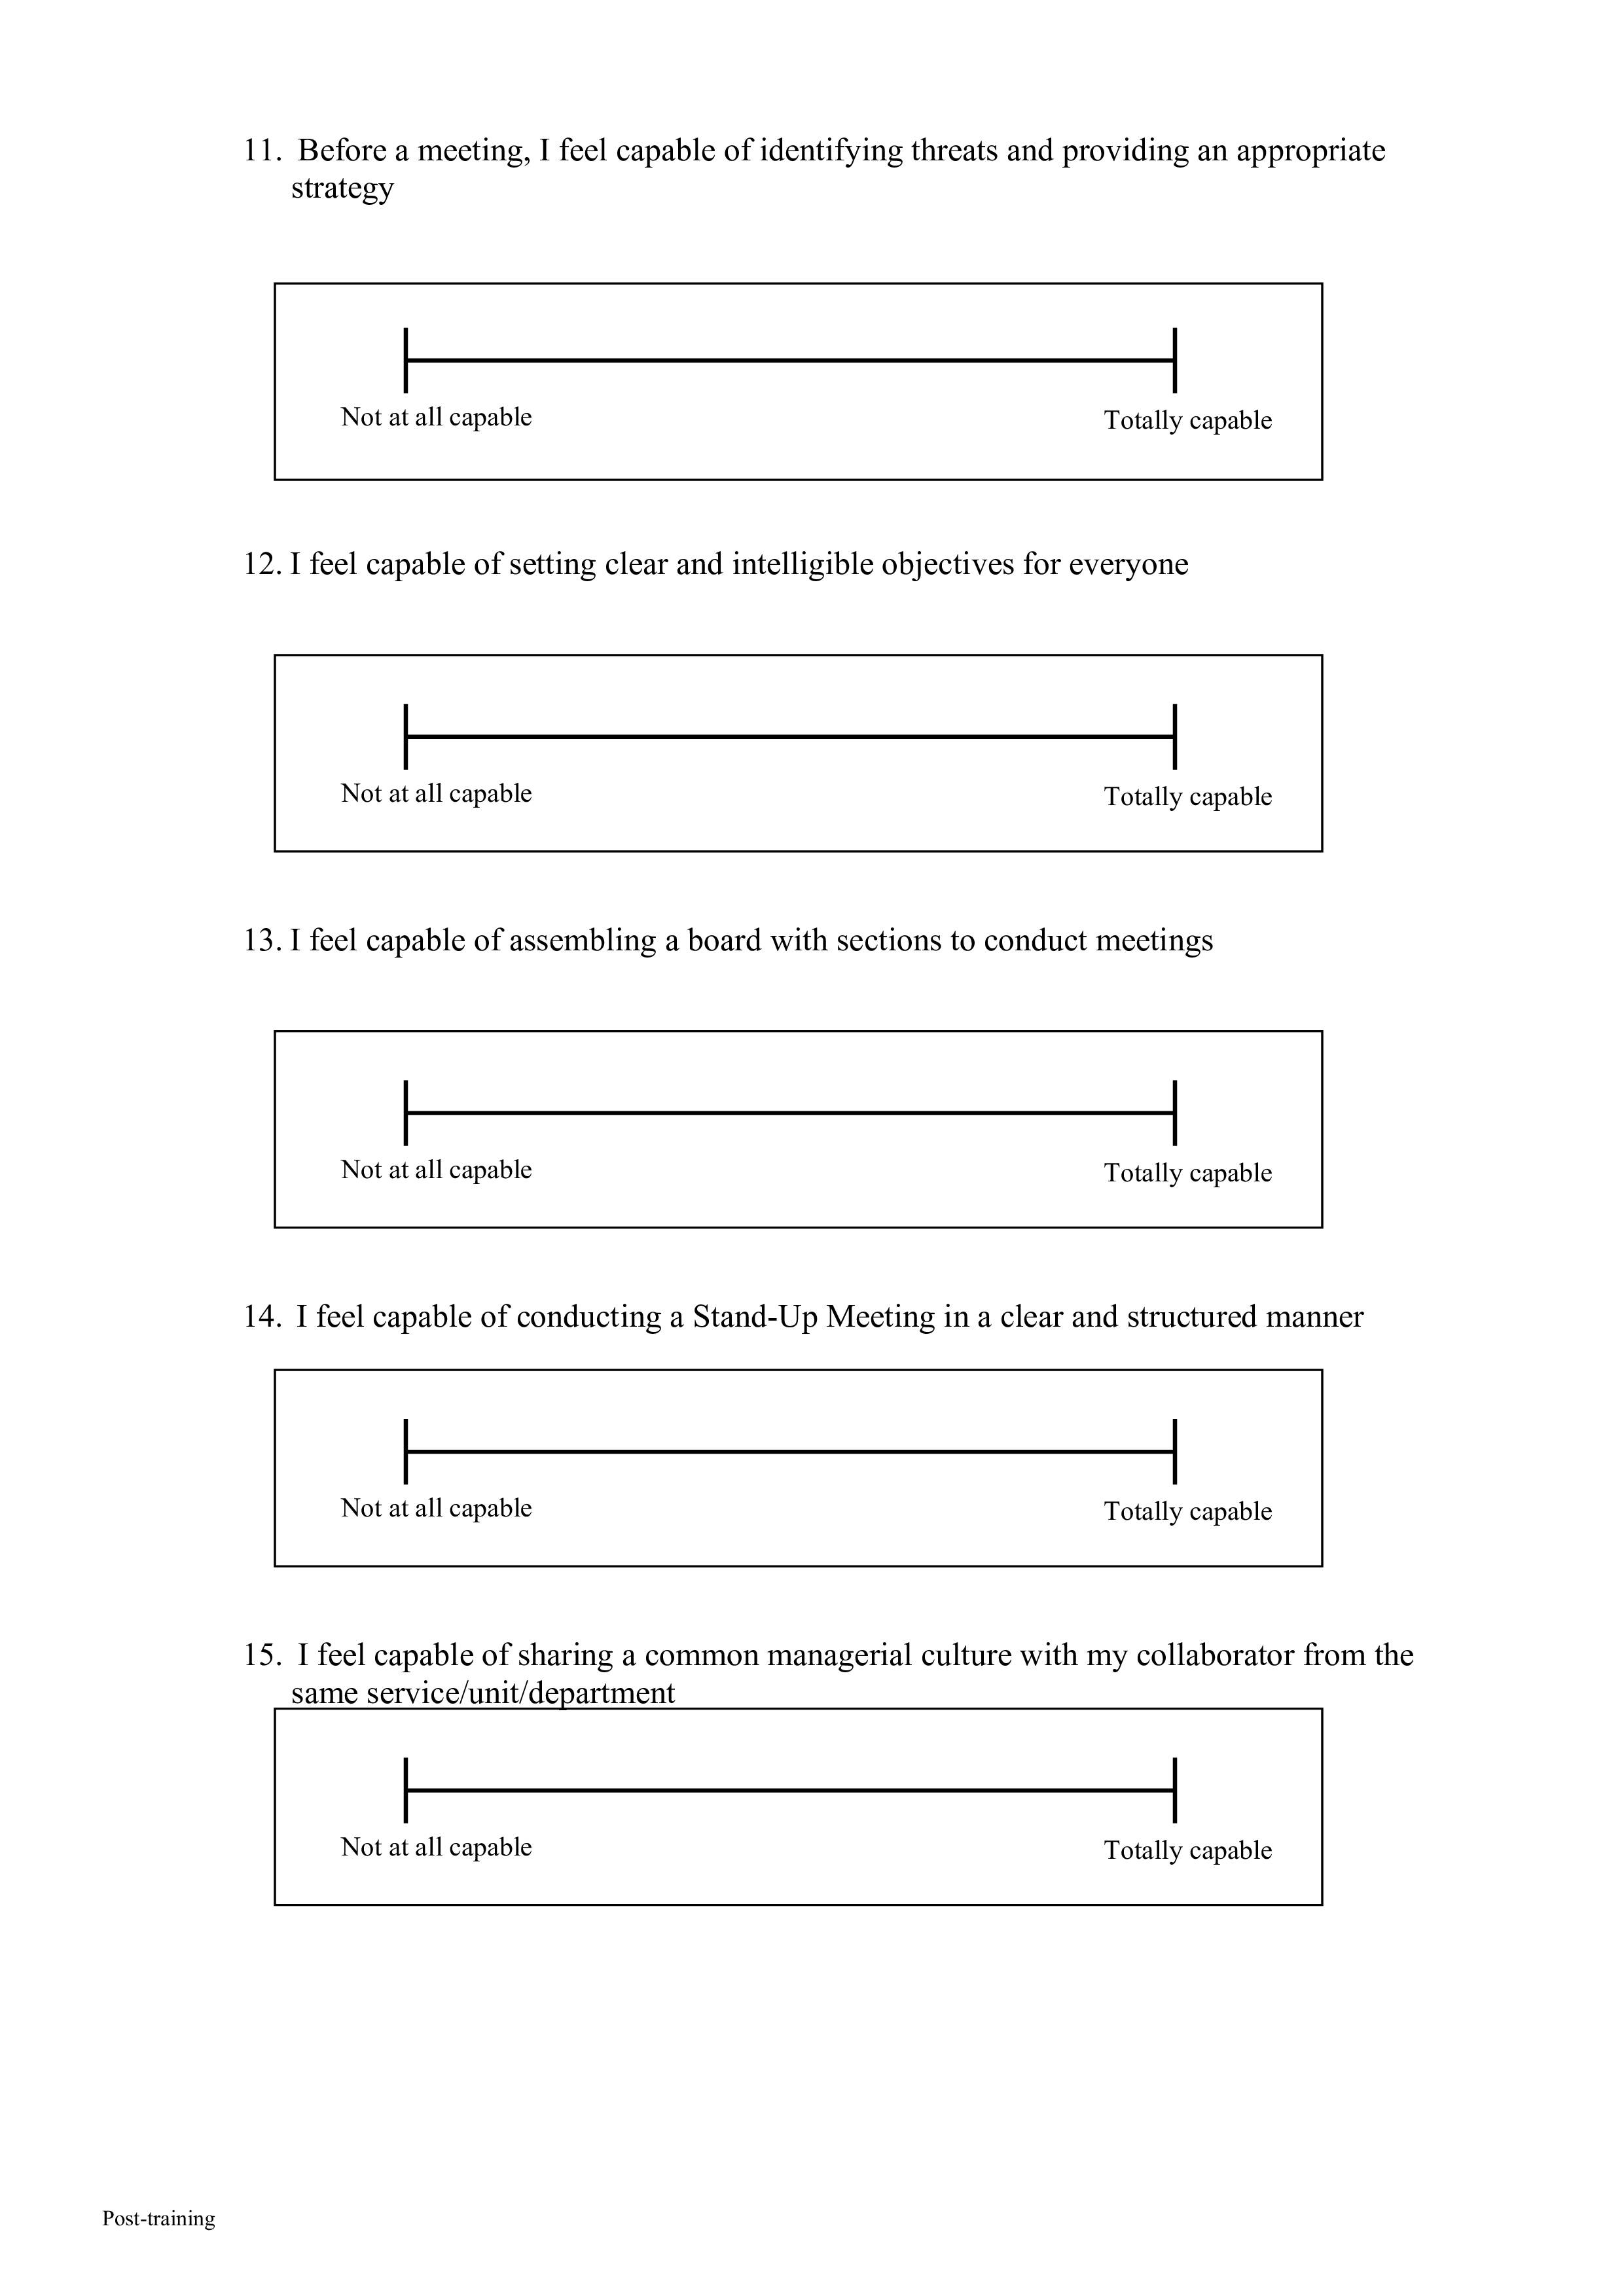
*

**Supplementary Figure 4.** Follow-up post-training (T2) Leadership Self-efficacy Questionnaire


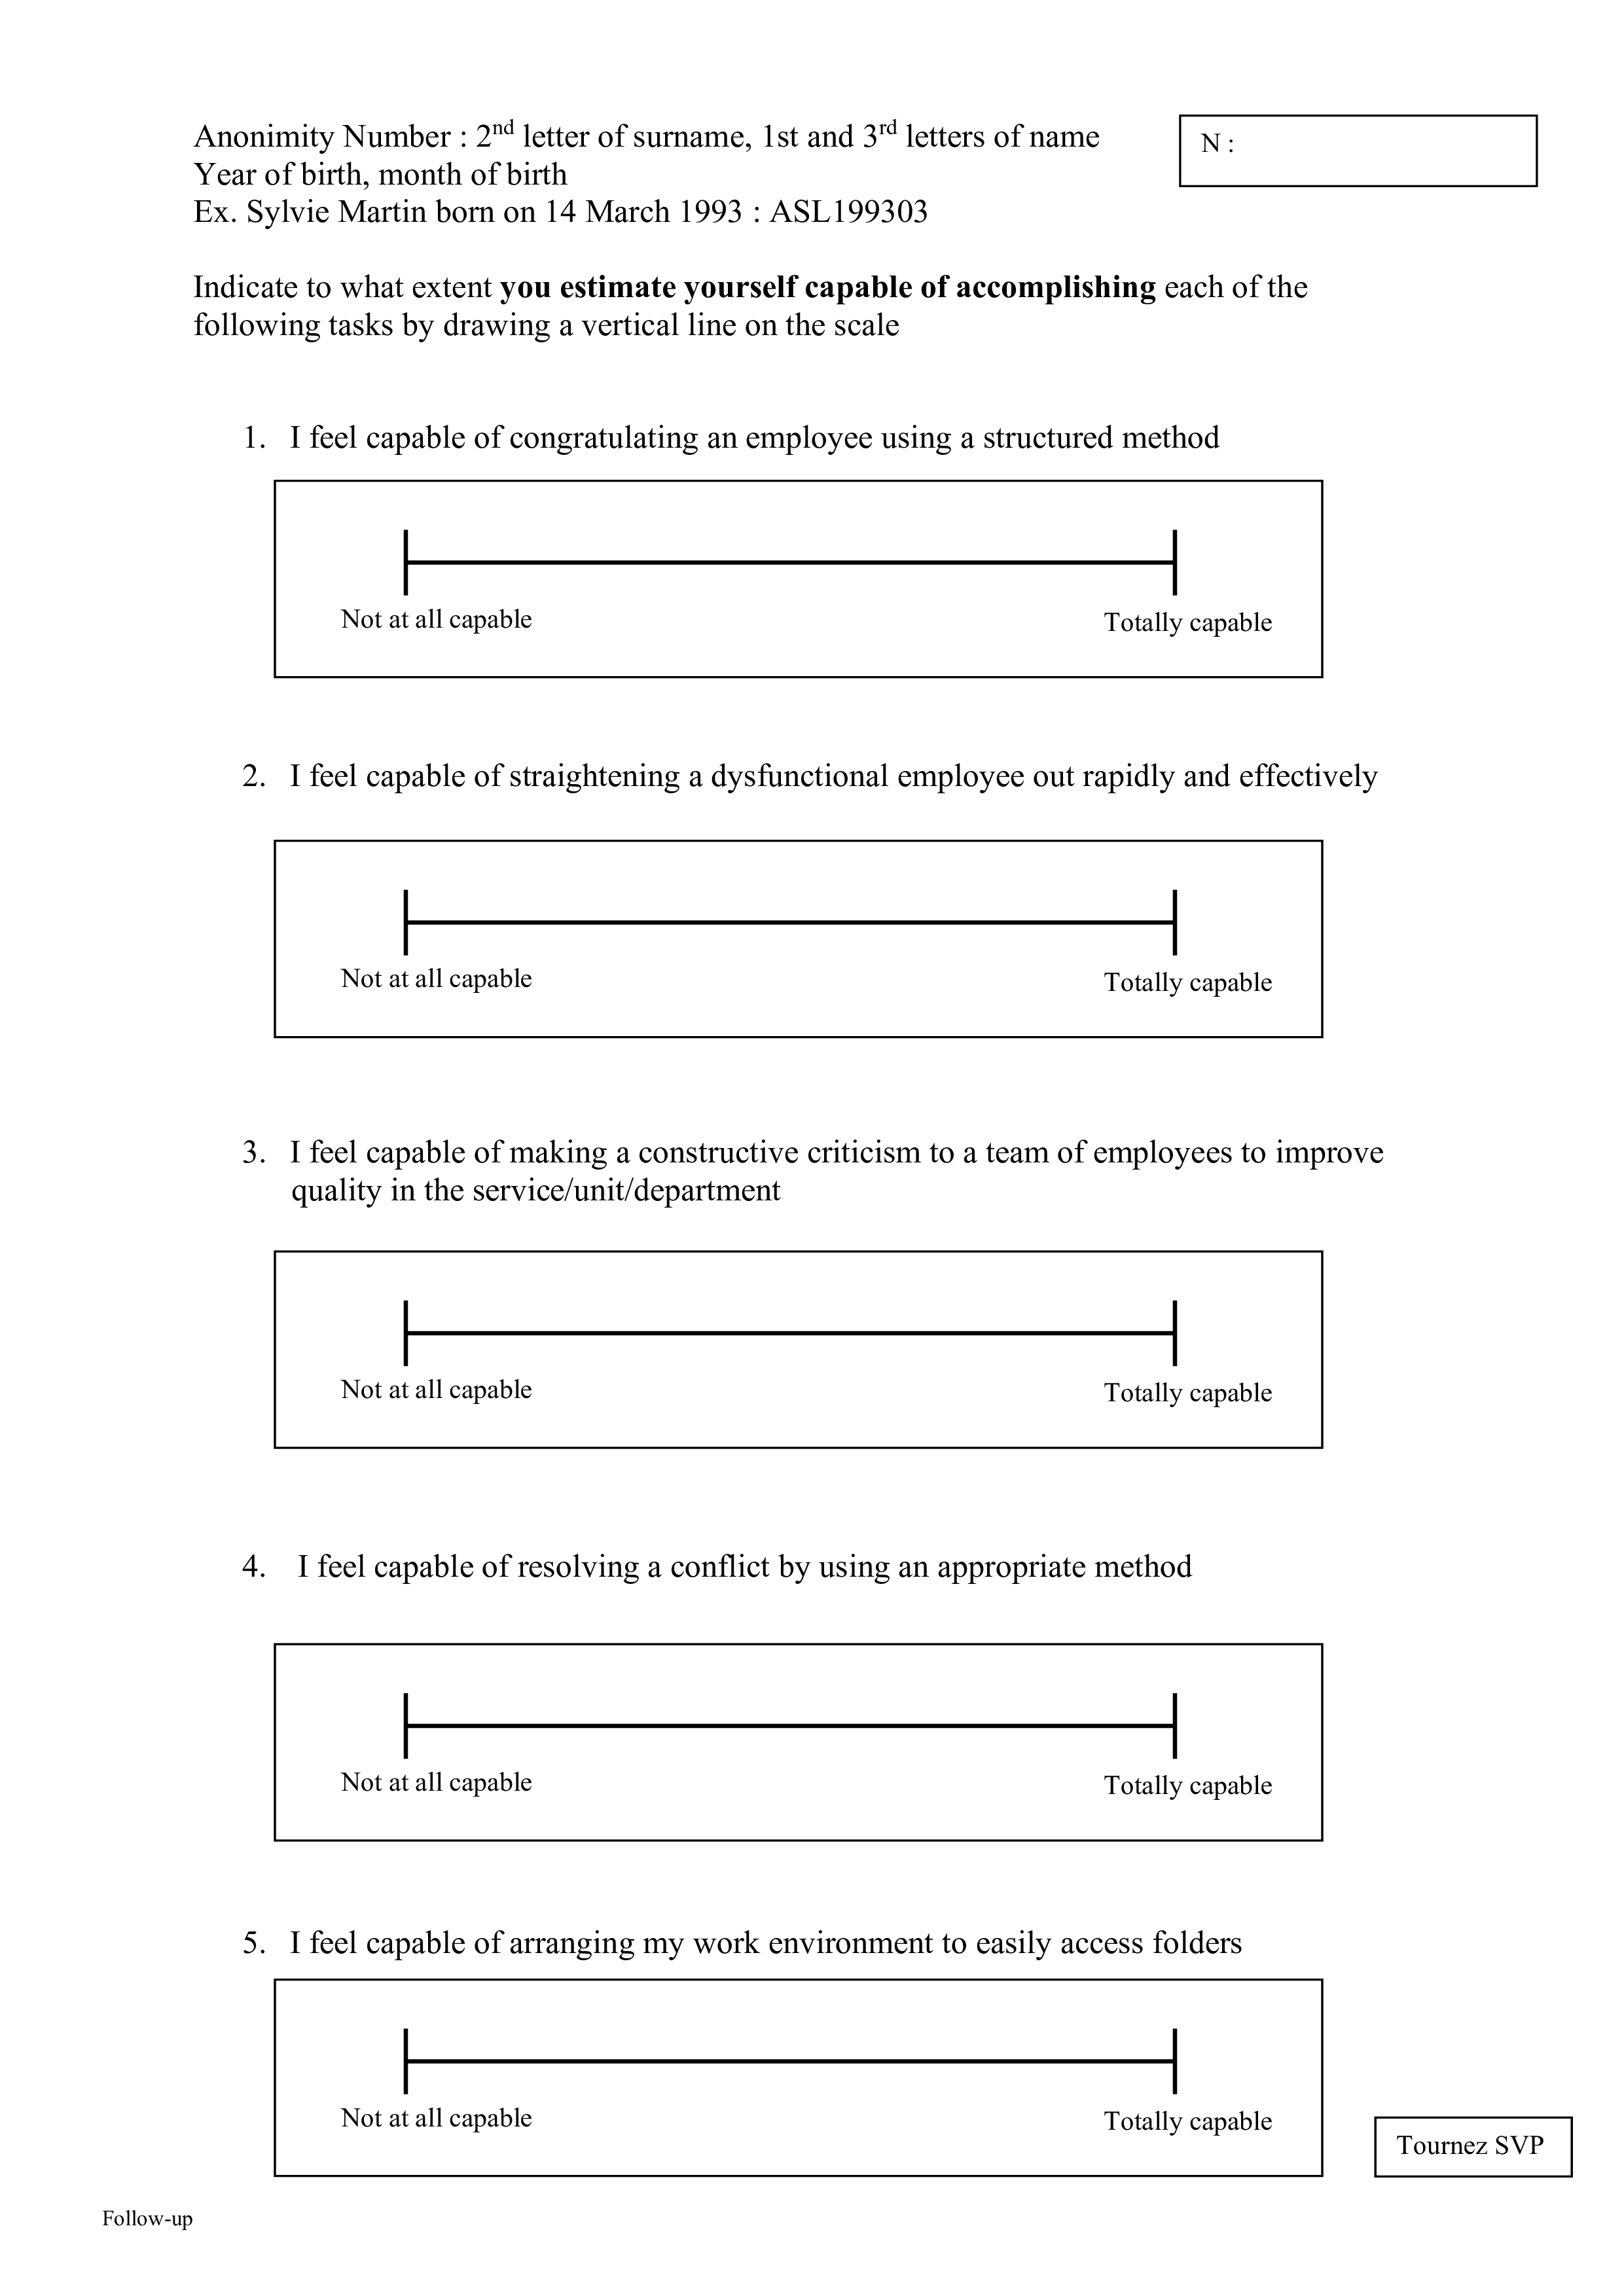


*
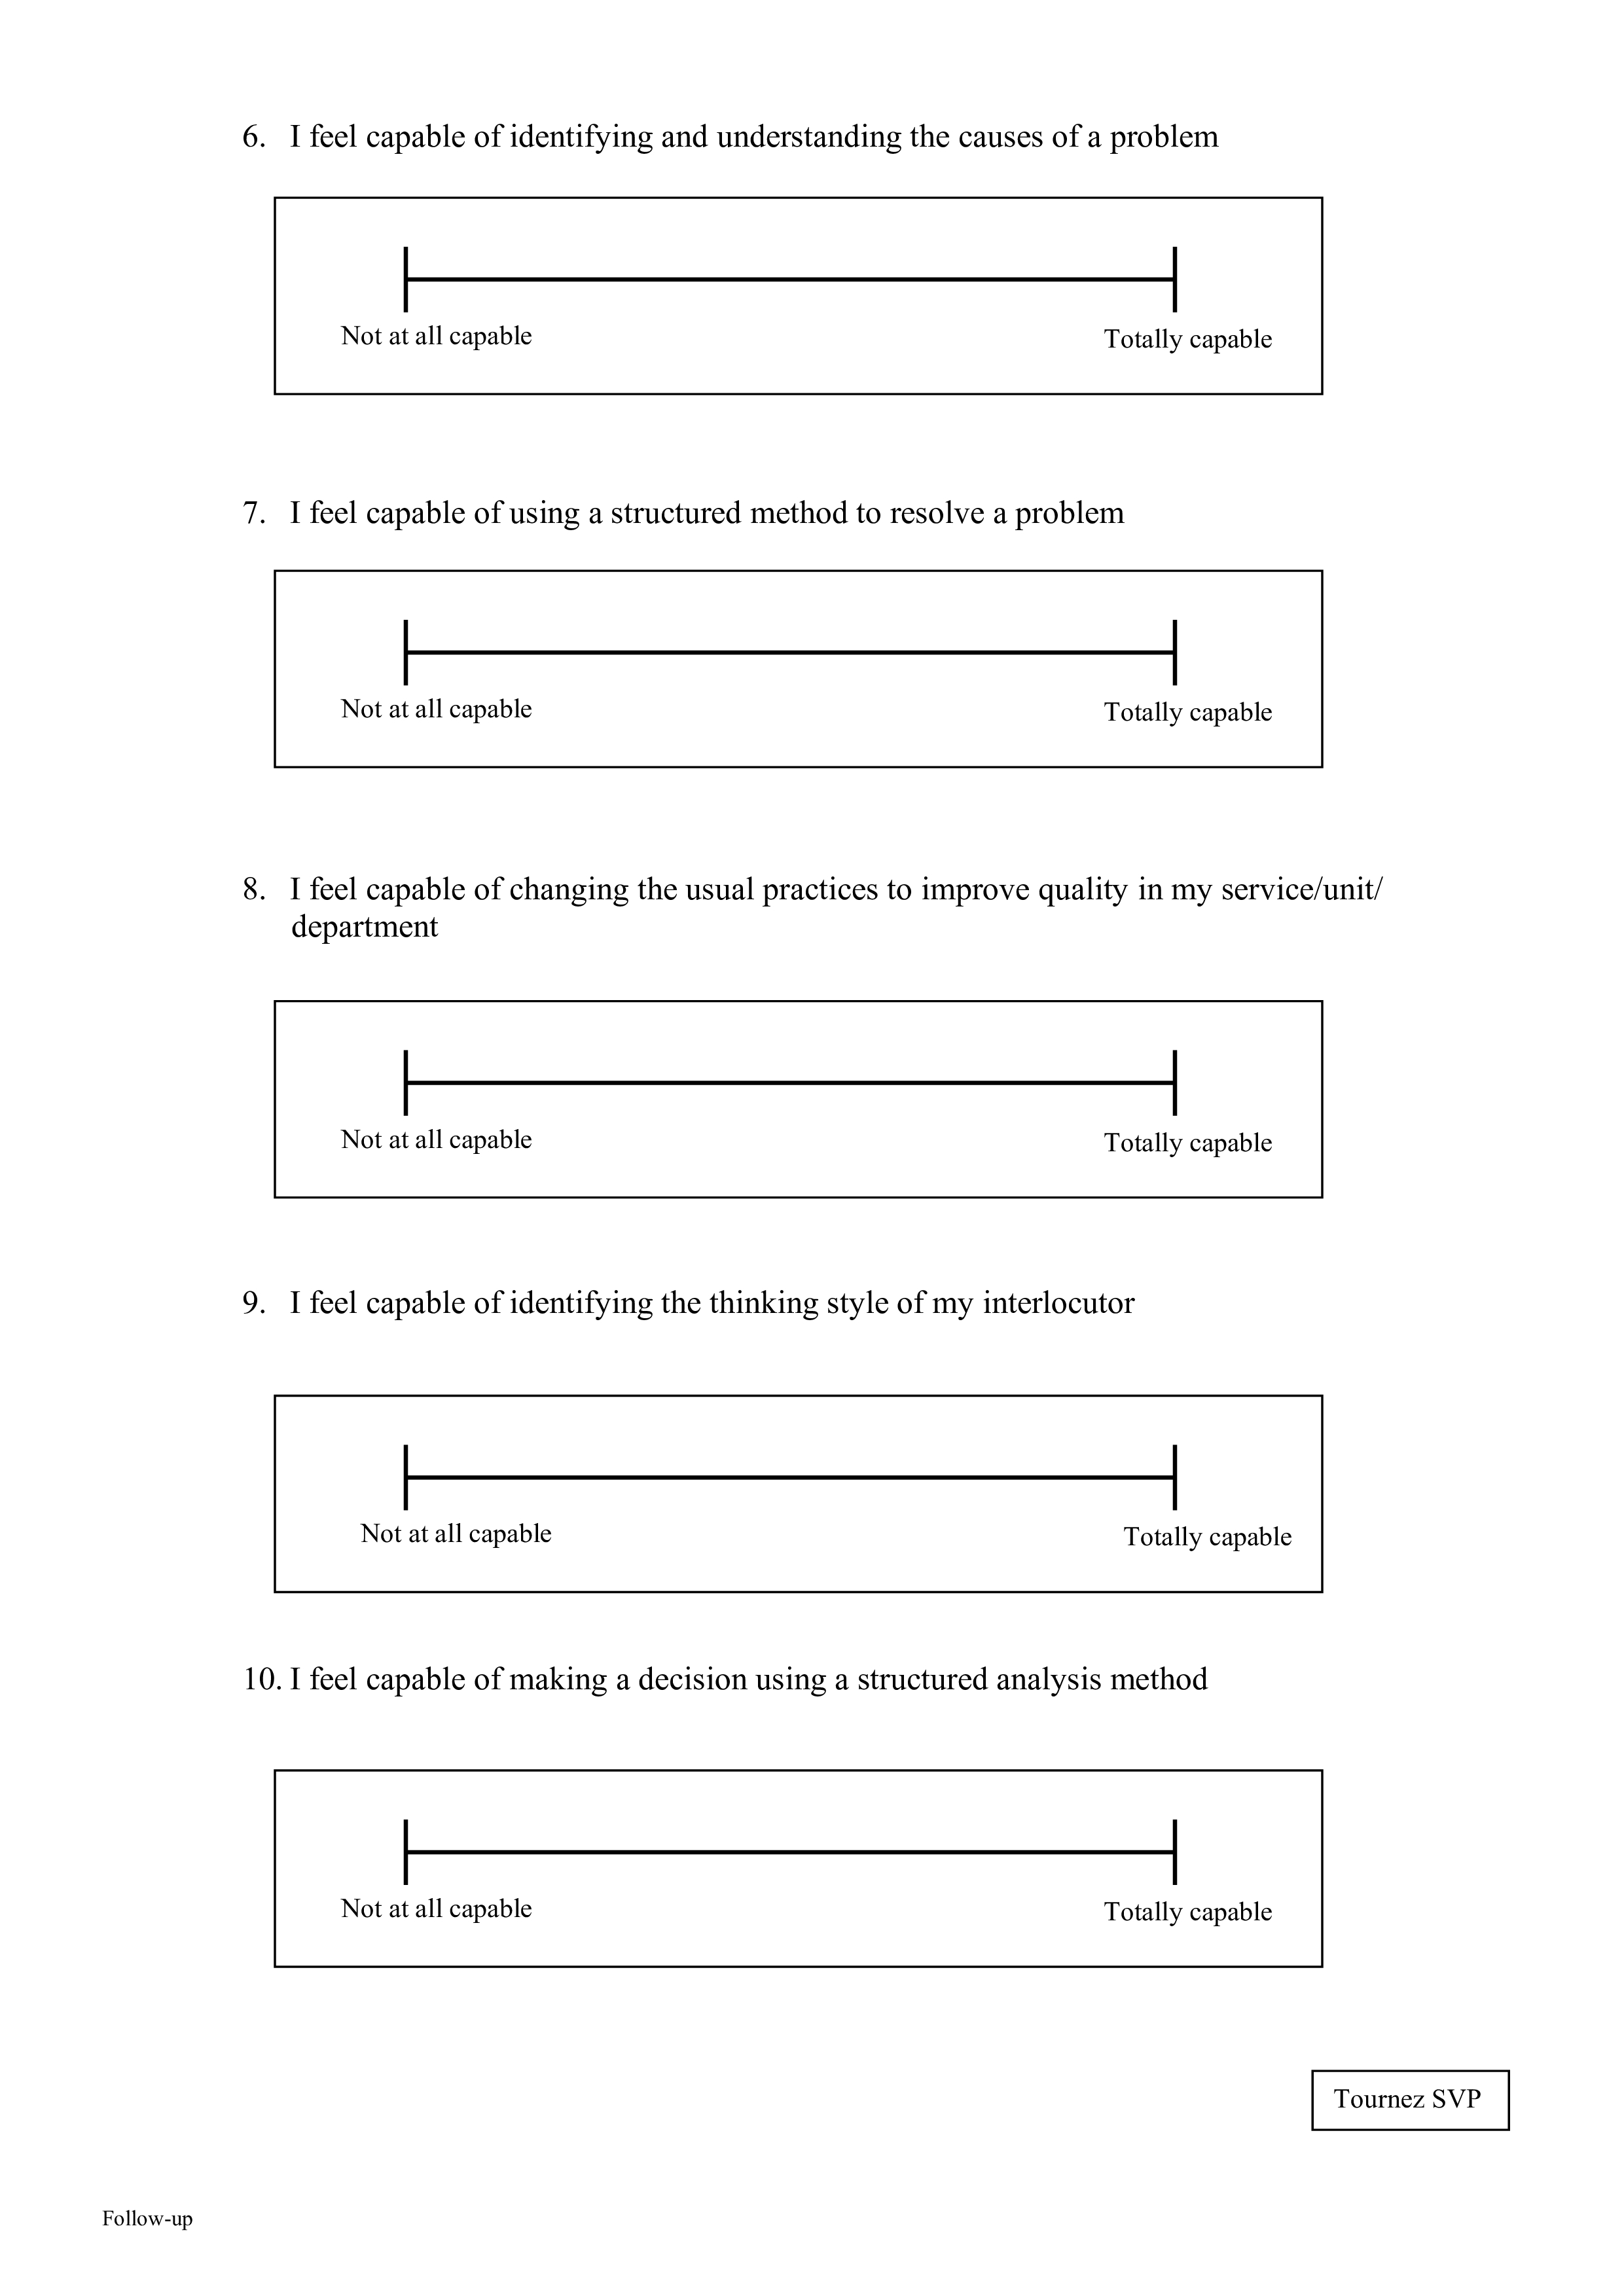
*

*
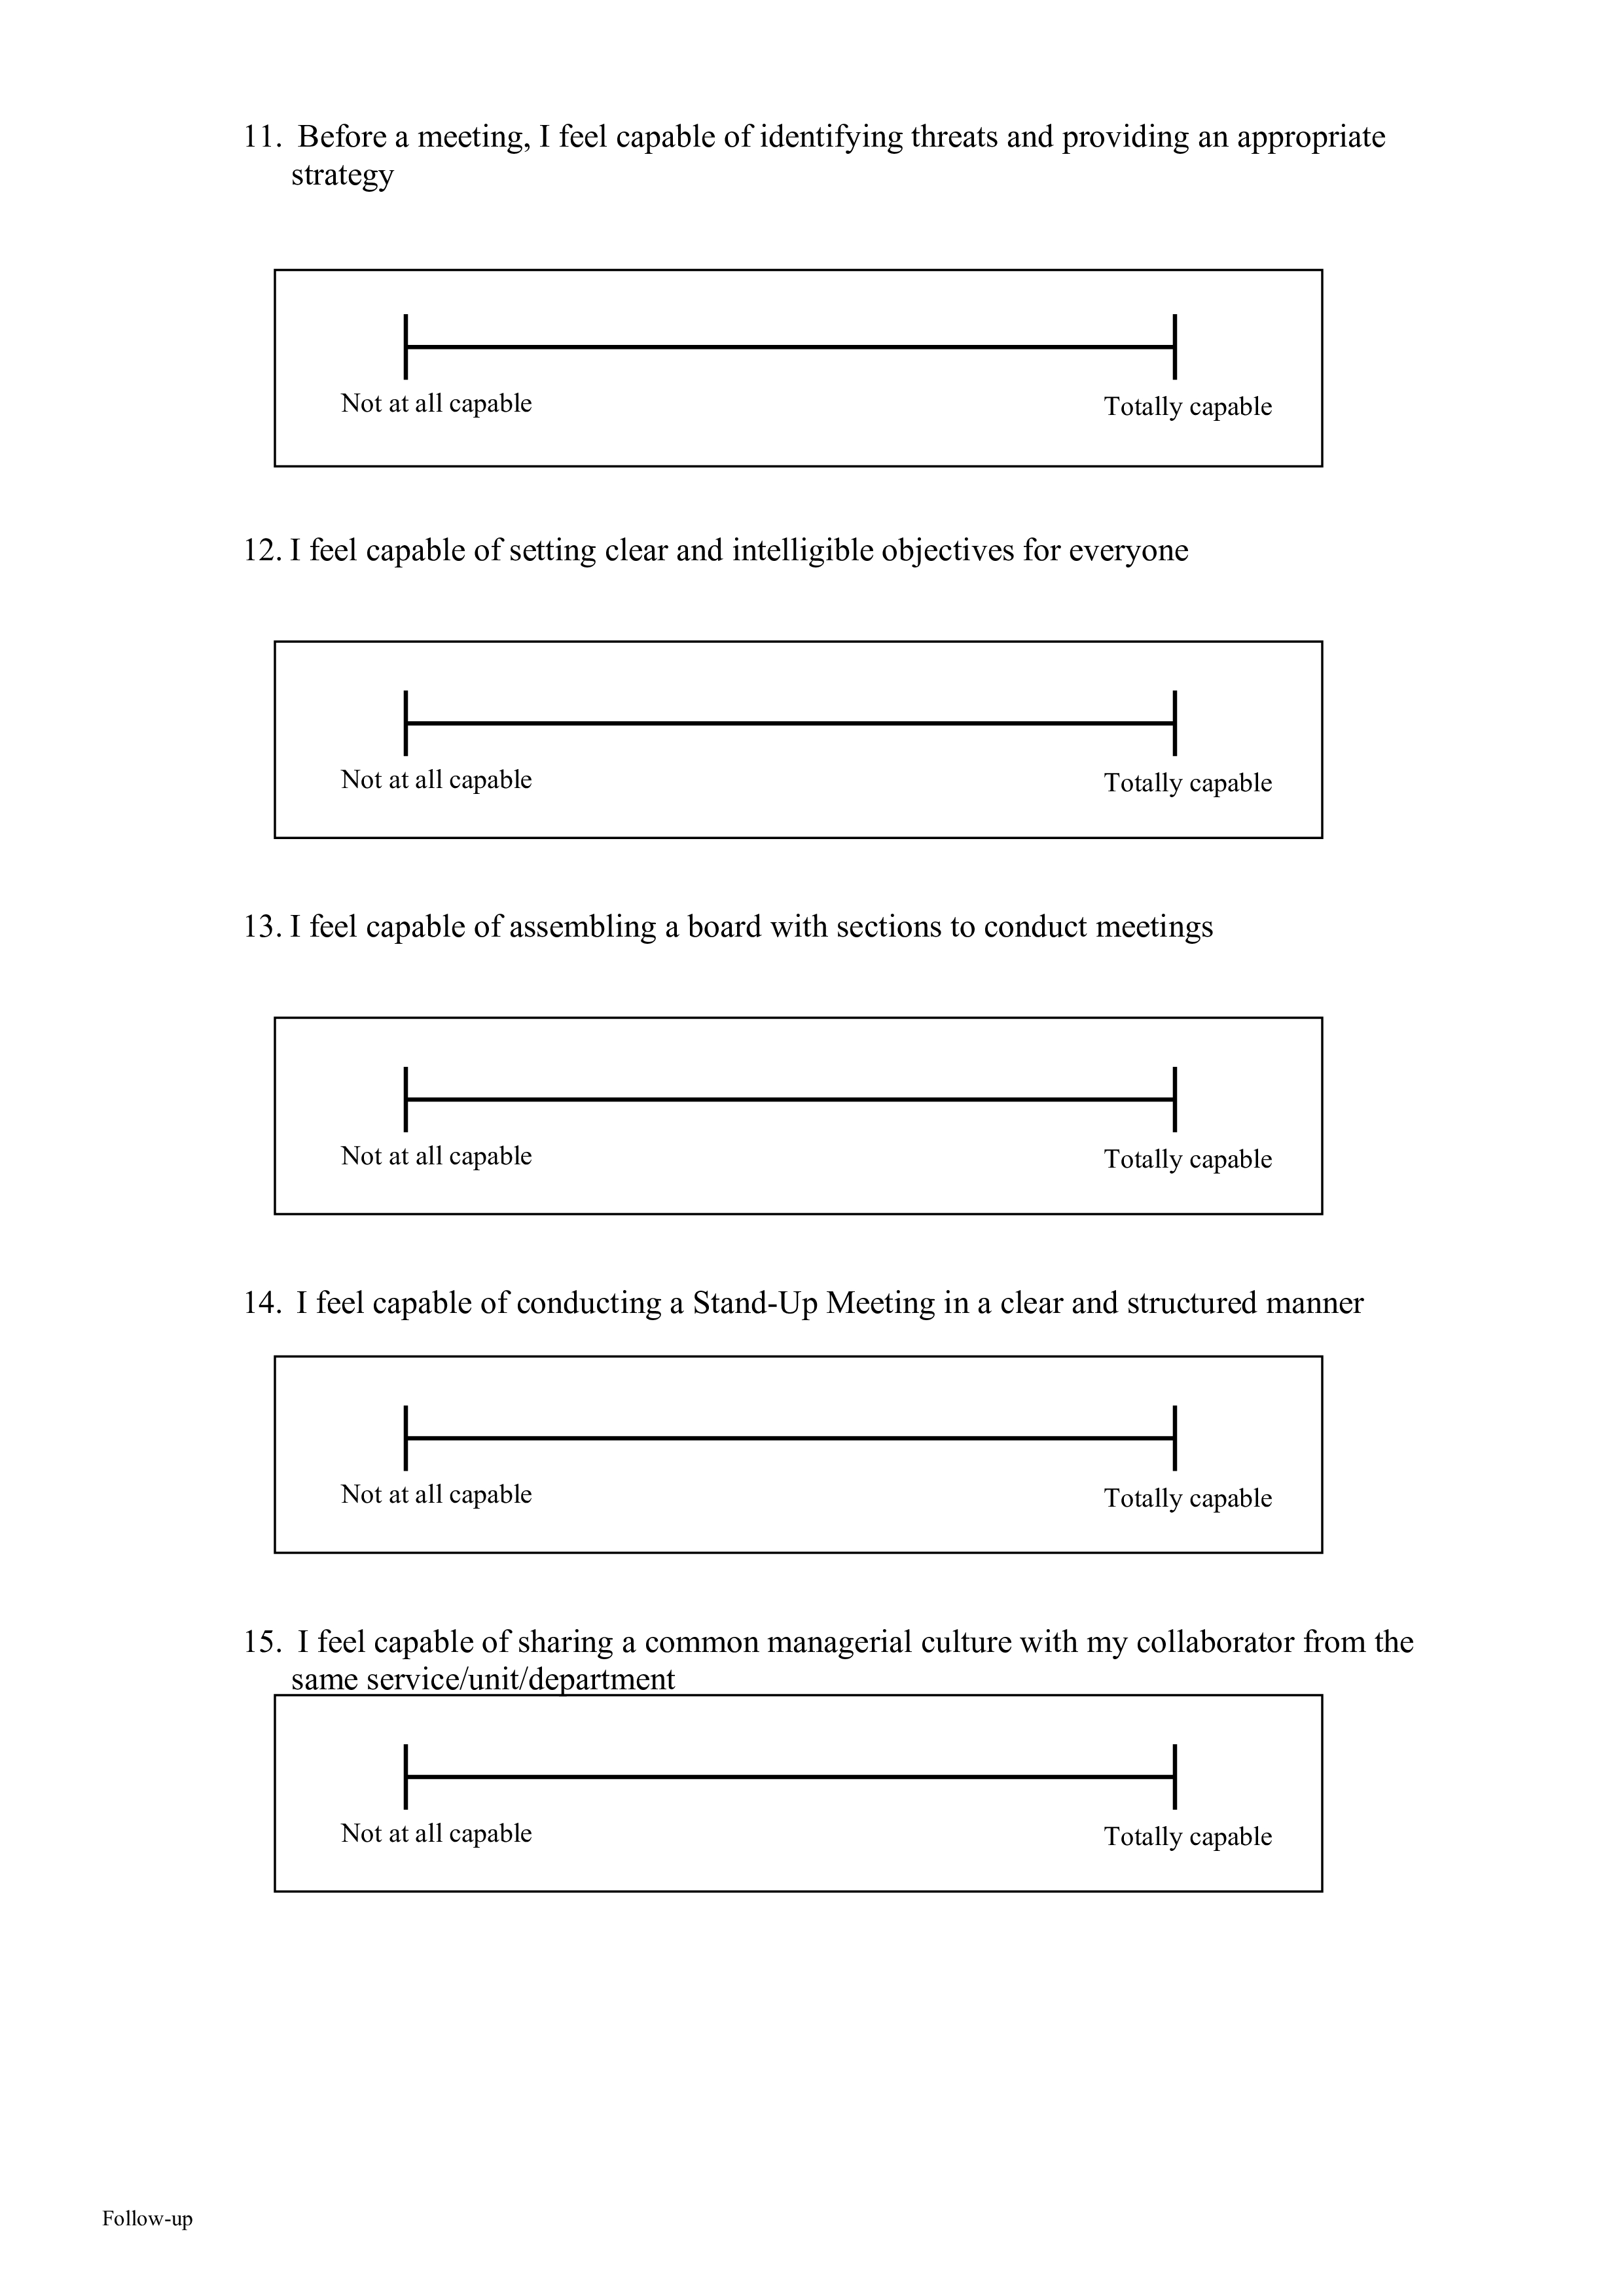
*
